# Supplementary material
Source: PubMed Central journal article supplement (PMC4238695)
Supplement: es502490w_si_001.pdf [file es502490w_si_001.pdf]

## SUPPORTING INFORMATION

### Variability in PCB and OH-PCB serum levels in children and their mothers in urban and rural U.S. communities

Rachel F. Marek<sup>1,2</sup>, Peter S. Thorne<sup>1,3\*</sup>, Jeanne DeWall<sup>3</sup>, and Keri C. Hornbuckle<sup>1,2,3\*</sup>

1. Department of Civil & Environmental Engineering,  
The University of Iowa, Iowa City IA (USA) 52242
2. IIHR-Hydroscience and Engineering  
The University of Iowa, Iowa City IA (USA) 52242
3. Department of Occupational and Environmental Health  
The University of Iowa, Iowa City IA (USA) 52242

\*Corresponding contact information: Keri C. Hornbuckle: 4105 SC, Iowa City, IA 52242; keri-hornbuckle@uiowa.edu; Phone: (319) 384-0789; FAX: (319) 335-5660; Peter S. Thorne: 105 River St., S341A CPHB, Iowa City, IA 52242; peter-thorne@uiowa.edu; Phone: (319) 335-4216; FAX: (319) 384-4138.

Number of pages: 25

Number of figures: 1

Number of tables: 12

## Methods and Materials

Table S1 Surrogate and internal standards purchased from Cambridge Isotope Laboratories, Inc., Andover, MA, USA (CIL) and AccuStandard, Inc., New Haven, CT, USA (AccuStd).

| Congener                                                             | Abbreviation             | Source  |
|----------------------------------------------------------------------|--------------------------|---------|
| <b>Surrogate Standards</b>                                           |                          |         |
| 4-monochlorobiphenyl ( $^{13}\text{C}_{12}$ )                        | $^{13}\text{C}$ -PCB 3   | CIL     |
| 4,4'-dichlorobiphenyl ( $^{13}\text{C}_{12}$ )                       | $^{13}\text{C}$ -PCB 15  | CIL     |
| 2,4,4'-trichlorobiphenyl ( $^{13}\text{C}_{12}$ )                    | $^{13}\text{C}$ -PCB 28  | CIL     |
| 2,2',5,5'-tetrachlorobiphenyl ( $^{13}\text{C}_{12}$ )               | $^{13}\text{C}$ -PCB 52  | CIL     |
| 2,3',4,4',5-pentachlorobiphenyl ( $^{13}\text{C}_{12}$ )             | $^{13}\text{C}$ -PCB 118 | CIL     |
| 2,2',4,4',5,5'-hexachlorobiphenyl ( $^{13}\text{C}_{12}$ )           | $^{13}\text{C}$ -PCB 153 | CIL     |
| 2,2',3,4,4',5,5'-heptachlorobiphenyl ( $^{13}\text{C}_{12}$ )        | $^{13}\text{C}$ -PCB 180 | CIL     |
| 2,2',3,3',4,4',5,5'-octachlorobiphenyl ( $^{13}\text{C}_{12}$ )      | $^{13}\text{C}$ -PCB 194 | CIL     |
| 2,2',3,3',4,5,5',6,6'-nonachlorobiphenyl ( $^{13}\text{C}_{12}$ )    | $^{13}\text{C}$ -PCB 208 | CIL     |
| 2,2',3,3',4,4',5,5',6,6'-decachlorobiphenyl ( $^{13}\text{C}_{12}$ ) | $^{13}\text{C}$ -PCB 209 | CIL     |
| 4'-hydroxy-2,3,3',4,5,5'-hexachlorobiphenyl                          | 4'-OH-PCB 159            | AccuStd |
| <b>Internal Standards (PCBs)</b>                                     |                          |         |
| 2,3',4',5-tetrachlorobiphenyl ( $^{13}\text{C}_{12}$ )               | $^{13}\text{C}$ -PCB 70  | CIL     |
| 2,3,3',5,5'-pentachlorobiphenyl ( $^{13}\text{C}_{12}$ )             | $^{13}\text{C}$ -PCB 111 | CIL     |
| 2,2',3,4,4',5'-hexachlorobiphenyl ( $^{13}\text{C}_{12}$ )           | $^{13}\text{C}$ -PCB 138 | CIL     |
| 2,2',3,3',4,4',5-heptachlorobiphenyl ( $^{13}\text{C}_{12}$ )        | $^{13}\text{C}$ -PCB 170 | CIL     |
| <b>Internal Standard (OH-PCB)</b>                                    |                          |         |
| 2,2',3,3',4,4',5,5',6,6'-decachlorobiphenyl                          | PCB 209                  | AccuStd |

### PCBs

The Agilent 6890N GC was equipped with a Supelco SPB-Octyl capillary column (30 m x 0.25 mm ID, 0.25  $\mu\text{m}$  film thickness) with helium as the carrier gas and argon as the collision gas. The GC operated at the following conditions: injector temperature 270  $^{\circ}\text{C}$ , interface temperature 230  $^{\circ}\text{C}$ , initial temperature 75  $^{\circ}\text{C}$ , initial time 2 min. The GC temperature program used was 75 to 150  $^{\circ}\text{C}$  at 15  $^{\circ}\text{C min}^{-1}$ , 150 to 290  $^{\circ}\text{C}$  at 2.5  $^{\circ}\text{C min}^{-1}$ , and final hold 1 min.

The Agilent 7000 was equipped with a Supelco SPB-Octyl capillary column (30 m x 0.25 mm ID, 0.25  $\mu\text{m}$  film thickness) with helium as the carrier gas flowing at 0.8 mL/min and nitrogen/argon as the collision gas. The GC operated in solvent vent injection mode at the following injection conditions: initial temperature 45  $^{\circ}\text{C}$ , initial time 0.06 min, ramp 600  $^{\circ}\text{C min}^{-1}$  to inlet temperature 325  $^{\circ}\text{C}$  at 4.4 psi. The GC oven temperature program was 45  $^{\circ}\text{C}$  for 2.56 min, 45 to 75  $^{\circ}\text{C}$  at 100  $^{\circ}\text{C min}^{-1}$ , 75 to 150  $^{\circ}\text{C}$  at 15  $^{\circ}\text{C/min}$ , 150 to 280 at 2.5  $^{\circ}\text{C/min}$  and final hold 5 min (total run time 70.86 min). The triple quadrupole MS Electron Ionization source was set to 260  $^{\circ}\text{C}$ . The MS-MS operated with the precursor-product transitions in Table S2. The PCB limit of quantification (LOQ) is shown in Table S3.

#### OH-PCBs

The GC was equipped with a DB-5 capillary column (30 m x 0.25 mm ID, 0.25  $\mu\text{m}$  film thickness) with helium as the carrier gas flowing at 1.3 mL/min and argon/methane (95%/5%) as the collision gas. The GC operated at the following conditions: injector temperature 250  $^{\circ}\text{C}$  at 20.52 psi, initial temperature 150  $^{\circ}\text{C}$ , initial time 2 min. The GC temperature program used was 150 to 200  $^{\circ}\text{C}$  at 30  $^{\circ}\text{C min}^{-1}$ , 200 to 230  $^{\circ}\text{C}$  at 1  $^{\circ}\text{C min}^{-1}$ , 230 to 300  $^{\circ}\text{C}$  at 10  $^{\circ}\text{C min}^{-1}$  and final hold 15 min. Detector temperature was set to 360  $^{\circ}\text{C}$ . The OH-PCB Limit of Quantification (LOQ) is shown in Table S4.

PCB and OH-PCB congener mass below the LOQ was given a conservative value of 0 after it was previously determined that other common imputations such as  $\text{LOQ}/2$  and  $\text{LOQ}/\sqrt{2}$  significantly affected the data in a misleading manner: The  $\Sigma 209$  PCBs increased by more than an order of magnitude and the four subgroups (mothers and children from each community) all had very similar concentrations. These misleading changes occurred because of the large number of congeners not detected in most samples.

Table S2 Precursor and product masses employed in Multiple Reaction Monitoring mode on the tandem MS-MS.

| Homolog               | Precursor Mass | Product Mass |
|-----------------------|----------------|--------------|
| mono                  | 188.00         | 152.00       |
| di                    | 222.00         | 152.10       |
| tri                   | 255.96         | 186.00       |
| tetra                 | 291.92         | 222.00       |
| penta                 | 325.88         | 255.90       |
| hexa                  | 359.84         | 289.90       |
| hepta                 | 393.80         | 323.90       |
| octa                  | 427.76         | 357.80       |
| nona                  | 461.72         | 391.80       |
| deca                  | 497.68         | 427.70       |
| <sup>13</sup> C-mono  | 200.00         | 164.00       |
| <sup>13</sup> C-di    | 234.00         | 164.00       |
| <sup>13</sup> C-tri   | 268.0          | 198.00       |
| <sup>13</sup> C-tetra | 304.00         | 234.00       |
| <sup>13</sup> C-penta | 338.00         | 268.00       |
| <sup>13</sup> C-hexa  | 372.00         | 302.00       |
| <sup>13</sup> C-hepta | 406.00         | 336.00       |
| <sup>13</sup> C-octa  | 440.00         | 370.00       |
| <sup>13</sup> C-nona  | 474.00         | 404.00       |
| <sup>13</sup> C-deca  | 410.70         | 438.90       |

Table S3 Limit of Quantification (LOQ) for each PCB congener, in units of ng/sample.

| PCB         | LOQ    |        | PCB         | LOQ    |        |
|-------------|--------|--------|-------------|--------|--------|
| 1           | 0.0073 | 0.0077 | 107+123     | 0.0160 | 0.0160 |
| 2           | 0.0100 | 0.0071 | 108+124     | 0.0310 | 0.0170 |
| 3           | 0.0160 | 0.0260 | 110+115     | 0.2700 | 0.0650 |
| 4           | 0.0600 | 0.0120 | 111         | 0.0054 | 0.0110 |
| 5           | 0.0078 | 0.0054 | 112         | 0.0170 | 0.0140 |
| 6           | 0.0190 | 0.0075 | 114         | 0.0100 | 0.0097 |
| 7           | 0.0110 | 0.0200 | 118         | 0.2500 | 0.0710 |
| 8           | 0.0820 | 0.0310 | 120         | 0.0100 | 0.0093 |
| 9           | 0.0043 | 0.0061 | 121         | 0.0058 | 0.0080 |
| 10          | 0.0057 | 0.0043 | 122         | 0.0170 | 0.0110 |
| 11          | 0.3500 | 0.1200 | 126         | 0.0093 | 0.0180 |
| 12+13       | 0.0210 | 0.0093 | 127         | 0.0280 | 0.0290 |
| 14          | 0.0270 | 0.0280 | 128+166     | 0.0140 | 0.0150 |
| 15          | 0.0600 | 0.0310 | 129+138+163 | 0.0680 | 0.0370 |
| 16          | 0.0320 | 0.0130 | 130         | 0.0150 | 0.0200 |
| 17          | 0.0440 | 0.0087 | 131         | 0.0380 | 0.0150 |
| 18+30       | 0.0820 | 0.0200 | 132         | 0.0340 | 0.0280 |
| 19          | 0.0092 | 0.0052 | 133         | 0.0360 | 0.0180 |
| 20+28       | 0.1500 | 0.0660 | 134+143     | 0.0340 | 0.0160 |
| 21+33       | 0.0870 | 0.0620 | 135+151     | 0.0420 | 0.0210 |
| 22          | 0.0580 | 0.0180 | 136         | 0.0300 | 0.0130 |
| 23          | 0.0140 | 0.0048 | 137+164     | 0.0350 | 0.0190 |
| 24          | 0.0021 | 0.0064 | 139+140     | 0.0160 | 0.0098 |
| 25          | 0.0120 | 0.0160 | 141         | 0.0310 | 0.0170 |
| 26+29       | 0.0150 | 0.0140 | 142         | 0.0240 | 0.0250 |
| 27          | 0.0042 | 0.0041 | 144         | 0.0130 | 0.0110 |
| 31          | 0.1000 | 0.0500 | 145         | 0.0160 | 0.0059 |
| 32          | 0.0270 | 0.0091 | 146         | 0.0200 | 0.0110 |
| 34          | 0.0088 | 0.0055 | 147+149     | 0.0690 | 0.0280 |
| 35          | 0.0160 | 0.0079 | 148         | 0.0170 | 0.0120 |
| 36          | 0.0096 | 0.0082 | 150         | 0.0077 | 0.0076 |
| 37          | 0.1100 | 0.0230 | 152         | 0.0110 | 0.0075 |
| 38          | 0.0028 | 0.0052 | 153+168     | 0.0530 | 0.0260 |
| 39          | 0.0062 | 0.0090 | 154         | 0.0200 | 0.0110 |
| 40+41+71    | 0.0440 | 0.0230 | 155         | 0.0082 | 0.0048 |
| 42+59+62+75 | 0.0270 | 0.0280 | 156+157     | 0.0250 | 0.0350 |
| 43+73       | 0.0140 | 0.0360 | 158         | 0.0088 | 0.0120 |
| 44+47+65    | 0.2400 | 0.0600 | 159         | 0.0130 | 0.0120 |
| 45+51       | 0.0330 | 0.0200 | 160         | 0.0063 | 0.0230 |
| 46          | 0.0240 | 0.0200 | 161         | 0.0057 | 0.0110 |
| 48          | 0.0200 | 0.0190 | 162         | 0.0098 | 0.0120 |
| 49+69       | 0.1200 | 0.0320 | 165         | 0.0160 | 0.0110 |
| 50+53       | 0.0260 | 0.0140 | 167         | 0.0350 | 0.0110 |
| 52          | 0.6800 | 0.1400 | 169         | 0.0052 | 0.0250 |
| 54          | 0.0140 | 0.0092 | 170         | 0.0420 | 0.0190 |
| 55          | 0.0610 | 0.0160 | 171+173     | 0.0100 | 0.0130 |
| 56          | 0.0400 | 0.0190 | 172         | 0.0180 | 0.0170 |
| 57          | 0.0150 | 0.0074 | 174         | 0.0280 | 0.0210 |
| 58          | 0.0140 | 0.0130 | 175         | 0.0270 | 0.0160 |
| 60          | 0.0260 | 0.0210 | 176         | 0.0200 | 0.0110 |
| 61+70+74+76 | 0.5300 | 0.1900 | 177         | 0.0180 | 0.0200 |
| 63          | 0.0330 | 0.0160 | 178         | 0.0075 | 0.0210 |

Table S3, continued

| PCB                  | LOQ    |        | PCB     | LOQ    |        |
|----------------------|--------|--------|---------|--------|--------|
| 64                   | 0.0600 | 0.0240 | 179     | 0.0110 | 0.0150 |
| 66                   | 0.1300 | 0.0520 | 180+193 | 0.0089 | 0.0200 |
| 67                   | 0.0170 | 0.0062 | 181     | 0.0086 | 0.0150 |
| 68                   | 0.0098 | 0.0130 | 182     | 0.0094 | 0.0120 |
| 72                   | 0.0079 | 0.0110 | 183+185 | 0.0320 | 0.0300 |
| 77                   | 0.1500 | 0.0280 | 184     | 0.0130 | 0.0150 |
| 78                   | 0.0160 | 0.0210 | 186     | 0.0120 | 0.0160 |
| 79                   | 0.0100 | 0.0150 | 187     | 0.0100 | 0.0190 |
| 80                   | 0.0093 | 0.0087 | 188     | 0.0090 | 0.0120 |
| 81                   | 0.0093 | 0.0270 | 189     | 0.0310 | 0.0150 |
| 82                   | 0.0490 | 0.0110 | 190     | 0.0150 | 0.0110 |
| 83+99                | 0.1100 | 0.0430 | 191     | 0.0160 | 0.0160 |
| 84                   | 0.1400 | 0.0280 | 192     | 0.0180 | 0.0170 |
| 85+116+117           | 0.0590 | 0.0250 | 194     | 0.0120 | 0.0280 |
| 86+87+97+109+119+125 | 0.1900 | 0.0740 | 195     | 0.0290 | 0.0200 |
| 88+91                | 0.0580 | 0.0210 | 196     | 0.0210 | 0.0270 |
| 89                   | 0.0078 | 0.0097 | 197+200 | 0.0250 | 0.0170 |
| 90+101+113           | 0.3000 | 0.0780 | 198+199 | 0.0320 | 0.0270 |
| 92                   | 0.0580 | 0.0200 | 201     | 0.0150 | 0.0220 |
| 93+100               | 0.0160 | 0.0120 | 202     | 0.0230 | 0.0130 |
| 94                   | 0.0110 | 0.0140 | 203     | 0.0250 | 0.0200 |
| 95                   | 0.4400 | 0.0690 | 204     | 0.0066 | 0.0150 |
| 96                   | 0.0110 | 0.0067 | 205     | 0.0230 | 0.0220 |
| 98+102               | 0.0170 | 0.0110 | 206     | 0.0140 | 0.0240 |
| 103                  | 0.0160 | 0.0100 | 207     | 0.0140 | 0.0220 |
| 104                  | 0.0120 | 0.0068 | 208     | 0.0190 | 0.0180 |
| 105                  | 0.0790 | 0.0450 | 209     | 0.0057 | 0.0053 |
| 106                  | 0.0078 | 0.0180 |         |        |        |

Note: Two LOQ are given for each congener because of high variability of a few congeners in five of the 20 sample batches as discussed in the Quality Control section of Materials and Methods.

Table S4 Limit of quantification (LOQ) for each OH-PCB congener (as MeO-PCB) in units of nanogram per sample.

| Congener                                        | Abbreviation    | LOQ (ng/sample) |
|-------------------------------------------------|-----------------|-----------------|
| 4-methoxy-2,3,3',4',5-pentachlorobiphenyl       | 4'-MeO-PCB107   | 0.066           |
| 3-methoxy-2,3',4,4',5-pentachlorobiphenyl       | 3'- MeO -PCB118 | 0.0039          |
| 4'-methoxy-2,3',4,5,5'-pentachlorobiphenyl      | 4'- MeO -PCB120 | 0.044           |
| 4'-methoxy-2,2',3,3',4,5'-hexachlorobiphenyl    | 4'- MeO -PCB130 | 0.017           |
| 3'-methoxy-2,2',3,4,4',5'-hexachlorobiphenyl    | 3'- MeO -PCB138 | 0.0044          |
| 4-methoxy-2,2',3,4',5,5'-hexachlorobiphenyl     | 4'- MeO -PCB146 | 0.018           |
| 4-methoxy-2,3,3',4',5,6-hexachlorobiphenyl      | 4'- MeO -PCB163 | 0.0061          |
| 4'-methoxy-2,2',3,3',4,5,5'-heptachlorobiphenyl | 4'- MeO -PCB172 | 0.050           |
| 3'-methoxy-2,2',3,4,4',5,5'-heptachlorobiphenyl | 3'- MeO -PCB180 | 0.018           |
| 4-methoxy-2,2',3,4',5,5',6-heptachlorobiphenyl  | 4'- MeO -PCB187 | 0.014           |
| 4-methoxy-2,3,3',4',5,5',6-heptachlorobiphenyl  | 4'- MeO -PCB193 | 0.028           |

## Quality Control

Table S5 Sample surrogate standard recoveries. Average, standard deviation, median, and range are given in units of percent.

| Surrogate Standard      | Homolog applied to | Average (Standard Deviation) | Median | Range  |
|-------------------------|--------------------|------------------------------|--------|--------|
| <sup>13</sup> C-PCB 3   | PCB mono           | 58 (21)                      | 56     | 22-113 |
| <sup>13</sup> C-PCB 15  | PCB di             | 83 (22)                      | 82     | 39-139 |
| <sup>13</sup> C-PCB 28  | PCB tri            | 89 (15)                      | 87     | 54-140 |
| <sup>13</sup> C-PCB 52  | PCB tetra          | 89 (16)                      | 88     | 49-127 |
| <sup>13</sup> C-PCB 118 | PCB penta          | 93 (12)                      | 92     | 65-123 |
| <sup>13</sup> C-PCB 153 | PCB hexa           | 95 (14)                      | 93     | 53-157 |
| <sup>13</sup> C-PCB 180 | PCB hepta&octa     | 90 (15)                      | 90     | 45-132 |
| <sup>13</sup> C-PCB 194 | (none)             | 82 (30)                      | 79     | 9-185  |
| <sup>13</sup> C-PCB 208 | PCB nona           | 92 (26)                      | 87     | 39-167 |
| <sup>13</sup> C-PCB 209 | PCB deca           | 80 (45)                      | 66     | 27-213 |
| 4'-OH-PCB 159           | all OH-PCB         | 70 (11)                      | 70     | 40-113 |

Note: The surrogate standard recovery was used to adjust each sample mass. Recoveries of <sup>13</sup>C-PCB 194 were not used to adjust sample mass because of large variability in recoveries between instruments.



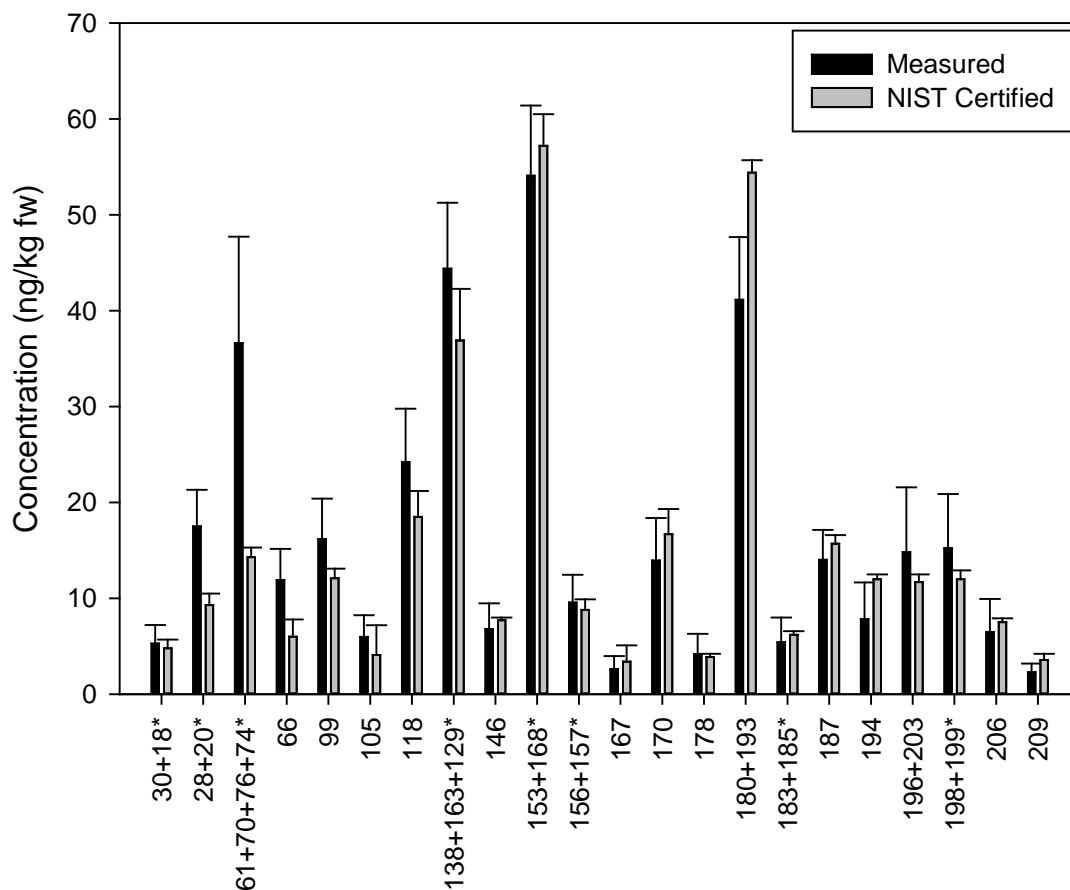

Figure S1 Results of NIST SRM 1957 quantification. Gray bars represent average values measured using our analytical method, and error bars represent the standard deviation (n=20). Black bars represent values certified by NIST. Error bars on the NIST values represent an expanded uncertainty about the mean as calculated by NIST. Asterisks represent congeners that eluted differently between methods.

Table S6 Average, standard deviation, median, and range of the four OH-PCBs measured in 20 aliquots of NIST SRM 1957 in units of ng/g fresh weight.

| OH-PCB        | Average<br>(Standard Deviation) | Median | Range        |
|---------------|---------------------------------|--------|--------------|
| 4'-OH-PCB 107 | 0.034 (0.0044)                  | 0.033  | 0.029-0.46   |
| 3'-OH-PCB 138 | 0.011 (0.0092)                  | 0.0056 | 0.0017-0.031 |
| 4'-OH-PCB 146 | 0.012 (0.0048)                  | 0.012  | 0.0056-0.022 |
| 4'-OH-PCB 187 | 0.023 (0.0064)                  | 0.022  | 0.018-0.048  |

Note: One aliquot of homogenized SRM was analyzed with every batch of samples.

**Common congener list.** A common congener list was used when comparing the year 1 and year 2 data sets (Table S7). PCBs 11, 52, 61+70+74+76, 90+101+113, and 95 and 14, 44+47+65, 128+166, and 204 were removed from the year 2 data set for the year-to-year comparison because they were ultimately excluded in the year 1 data set, the former group because of high variability in the method blanks as discussed elsewhere,<sup>1</sup> and the latter because they were used as surrogate or internal standards or co-eluted with those standards. 3-OH-PCB 118, 4'-OH-PCB 120, 4'-OH-PCB 130, 4'-OH-PCB 163, 4'-OH-PCB 172, 3'-OH-PCB 180, and 4'-OH-PCB 193 were removed from the year 2 data set for the year-to-year comparison because analytical standards were not purchased for sample analysis of these congeners until year 2.

Table S7 Common congener list used to compare year 1 and year 2 PCB and OH-PCB concentrations.

| PCB Congeners | PCB congeners,<br>continued | PCB congeners,<br>continued | PCB congeners,<br>continued | OH-PCB congeners |
|---------------|-----------------------------|-----------------------------|-----------------------------|------------------|
| 1             | 56                          | 127                         | 182                         | 4'-OH-PCB 107    |
| 2             | 57                          | 129+137+138+163+164         | 183+185                     | 3'-OH-PCB 138    |
| 3             | 58                          | 130                         | 184                         | 4'-OH-PCB 146    |
| 4             | 60                          | 131                         | 186                         | 4'-OH-PCB 187    |
| 5             | 63                          | 132                         | 187                         |                  |
| 6             | 64                          | 133                         | 188                         |                  |
| 7             | 66                          | 134+143                     | 189                         |                  |
| 8             | 67                          | 135+151                     | 190                         |                  |
| 9             | 68                          | 136                         | 191                         |                  |
| 10            | 72                          | 139+140                     | 192                         |                  |
| 12+13         | 77                          | 141                         | 194                         |                  |
| 15            | 78                          | 142                         | 195                         |                  |
| 16            | 79                          | 144                         | 196                         |                  |
| 17            | 80                          | 145                         | 197+200                     |                  |
| 18+30         | 81                          | 146                         | 198+199                     |                  |
| 19            | 82                          | 147+149                     | 201                         |                  |
| 20+28         | 83+99                       | 148                         | 202                         |                  |
| 21+33         | 84                          | 150                         | 203                         |                  |
| 22            | 85+116+117                  | 152                         | 205                         |                  |
| 23            | 86+87+97+109+119+125        | 153+168                     | 206                         |                  |
| 24            | 88+91                       | 154                         | 207                         |                  |
| 25            | 89                          | 155                         | 208                         |                  |
| 26+29         | 92                          | 156+157                     | 209                         |                  |
| 27            | 93+100                      | 158                         |                             |                  |
| 31            | 94                          | 159                         |                             |                  |
| 32            | 96                          | 160                         |                             |                  |
| 34            | 98+102                      | 161                         |                             |                  |
| 35            | 103                         | 162                         |                             |                  |
| 36            | 104                         | 165                         |                             |                  |
| 37            | 105                         | 167                         |                             |                  |
| 38            | 106                         | 169                         |                             |                  |
| 39            | 107+123                     | 170                         |                             |                  |
| 40+41+71      | 108+124                     | 171+173                     |                             |                  |
| 42+59+62+75   | 110+115                     | 172                         |                             |                  |
| 43+73         | 111                         | 174                         |                             |                  |
| 45+51         | 112                         | 175                         |                             |                  |
| 46            | 114                         | 176                         |                             |                  |
| 48            | 118                         | 177                         |                             |                  |
| 49+69         | 120                         | 178                         |                             |                  |
| 50+53         | 121                         | 179                         |                             |                  |
| 54            | 122                         | 180+193                     |                             |                  |
| 55            | 126                         | 181                         |                             |                  |

## Results

Table S8 PCB and OH-PCB congeners with statistically significant differences between participant sub-groups.

| Congener       | Difference                                         | p     |
|----------------|----------------------------------------------------|-------|
| <b>PCBs</b>    |                                                    |       |
| 11             | East Chicago children > Columbus Junction children | 0.025 |
| 64+70+74+76    | Columbus Junction mothers > East Chicago mothers   | 0.034 |
| 178            | Columbus Junction children > East Chicago children | 0.040 |
| 180+193        | Columbus Junction mothers > East Chicago mothers   | 0.012 |
| 194            | Columbus Junction mothers > East Chicago mothers   | 0.008 |
| 203            | Columbus Junction mothers > East Chicago mothers   | 0.046 |
| <b>OH-PCBs</b> |                                                    |       |
| 3'-OH-PCB 118  | East Chicago children > Columbus Junction children | 0.043 |
| 4'-OH-PCB 193  | East Chicago children > Columbus Junction children | 0.030 |

Table S9 Frequency of detection (Det), median (Med) and range (5th-95th percentile) of PCBs (ng/g lipid weight) detected in mothers and children from East Chicago and Columbus Junction.

| Congener | East Chicago (urban) |      |      |       |                   |      |      |       | Columbus Junction (rural) |      |      |      |                   |      |      |      |
|----------|----------------------|------|------|-------|-------------------|------|------|-------|---------------------------|------|------|------|-------------------|------|------|------|
|          | Mothers (n = 50)     |      |      |       | Children (n = 50) |      |      |       | Mothers (n = 43)          |      |      |      | Children (n = 49) |      |      |      |
|          | Det                  | Med  | 5%   | 95%   | Det               | Med  | 5%   | 95%   | Det                       | Med  | 5%   | 95%  | Det               | Med  | 5%   | 95%  |
| 1        | 10                   | <LOQ | <LOQ | 0.44  | 14                | <LOQ | <LOQ | 0.61  | 5                         | <LOQ | <LOQ | <LOQ | 8                 | <LOQ | <LOQ | 0.51 |
| 2        | 18                   | <LOQ | <LOQ | 1.57  | 18                | <LOQ | <LOQ | 1.28  | 9                         | <LOQ | <LOQ | 0.35 | 8                 | <LOQ | <LOQ | 0.37 |
| 3        | 12                   | <LOQ | <LOQ | 4.21  | 20                | <LOQ | <LOQ | 2.18  | 2                         | <LOQ | <LOQ | <LOQ | 10                | <LOQ | <LOQ | 1.09 |
| 4        | 10                   | <LOQ | <LOQ | 0.9   | 6                 | <LOQ | <LOQ | 0.37  | 2                         | <LOQ | <LOQ | <LOQ | 4                 | <LOQ | <LOQ | <LOQ |
| 5        | 12                   | <LOQ | <LOQ | 0.33  | 10                | <LOQ | <LOQ | 0.84  | 5                         | <LOQ | <LOQ | <LOQ | 0                 | <LOQ | <LOQ | <LOQ |
| 6        | 16                   | <LOQ | <LOQ | 0.64  | 12                | <LOQ | <LOQ | 1.16  | 12                        | <LOQ | <LOQ | 0.42 | 8                 | <LOQ | <LOQ | 0.44 |
| 7        | 6                    | <LOQ | <LOQ | 0.46  | 6                 | <LOQ | <LOQ | 0.71  | 7                         | <LOQ | <LOQ | 0.84 | 6                 | <LOQ | <LOQ | 0.99 |
| 8        | 20                   | <LOQ | <LOQ | 2.59  | 14                | <LOQ | <LOQ | 2.98  | 14                        | <LOQ | <LOQ | 1.95 | 12                | <LOQ | <LOQ | 2.24 |
| 9        | 8                    | <LOQ | <LOQ | 0.39  | 12                | <LOQ | <LOQ | 0.42  | 2                         | <LOQ | <LOQ | <LOQ | 4                 | <LOQ | <LOQ | <LOQ |
| 10       | 10                   | <LOQ | <LOQ | 0.43  | 8                 | <LOQ | <LOQ | 0.3   | 0                         | <LOQ | <LOQ | <LOQ | 4                 | <LOQ | <LOQ | <LOQ |
| 11       | 30                   | <LOQ | <LOQ | 12.78 | 34                | <LOQ | <LOQ | 12.42 | 26                        | <LOQ | <LOQ | 6.97 | 16                | <LOQ | <LOQ | 8.78 |
| 12+13    | 24                   | <LOQ | <LOQ | 1.39  | 22                | <LOQ | <LOQ | 1.55  | 14                        | <LOQ | <LOQ | 0.64 | 35                | <LOQ | <LOQ | 1    |
| 14       | 4                    | <LOQ | <LOQ | <LOQ  | 0                 | <LOQ | <LOQ | <LOQ  | 2                         | <LOQ | <LOQ | <LOQ | 0                 | <LOQ | <LOQ | <LOQ |
| 15       | 24                   | <LOQ | <LOQ | 3.56  | 24                | <LOQ | <LOQ | 3.88  | 19                        | <LOQ | <LOQ | 1.69 | 16                | <LOQ | <LOQ | 2.55 |
| 16       | 10                   | <LOQ | <LOQ | 0.73  | 4                 | <LOQ | <LOQ | <LOQ  | 9                         | <LOQ | <LOQ | 0.67 | 4                 | <LOQ | <LOQ | <LOQ |
| 17       | 10                   | <LOQ | <LOQ | 0.44  | 8                 | <LOQ | <LOQ | 0.71  | 9                         | <LOQ | <LOQ | 1.17 | 12                | <LOQ | <LOQ | 0.78 |
| 18+30    | 6                    | <LOQ | <LOQ | 0.46  | 6                 | <LOQ | <LOQ | 0.98  | 7                         | <LOQ | <LOQ | 2.72 | 6                 | <LOQ | <LOQ | 0.53 |
| 19       | 0                    | <LOQ | <LOQ | <LOQ  | 4                 | <LOQ | <LOQ | <LOQ  | 2                         | <LOQ | <LOQ | <LOQ | 2                 | <LOQ | <LOQ | <LOQ |
| 20+28    | 54                   | 2.76 | <LOQ | 5.86  | 38                | <LOQ | <LOQ | 6.1   | 51                        | 2.18 | <LOQ | 7.03 | 33                | <LOQ | <LOQ | 5.7  |
| 21+33    | 14                   | <LOQ | <LOQ | 3.52  | 4                 | <LOQ | <LOQ | <LOQ  | 14                        | <LOQ | <LOQ | 3.14 | 0                 | <LOQ | <LOQ | <LOQ |
| 22       | 36                   | <LOQ | <LOQ | 1.24  | 28                | <LOQ | <LOQ | 1.53  | 33                        | <LOQ | <LOQ | 1.64 | 24                | <LOQ | <LOQ | 1.5  |
| 23       | 10                   | <LOQ | <LOQ | 0.28  | 8                 | <LOQ | <LOQ | 0.45  | 2                         | <LOQ | <LOQ | <LOQ | 12                | <LOQ | <LOQ | 0.48 |
| 24       | 4                    | <LOQ | <LOQ | <LOQ  | 2                 | <LOQ | <LOQ | <LOQ  | 5                         | <LOQ | <LOQ | <LOQ | 0                 | <LOQ | <LOQ | <LOQ |
| 25       | 2                    | <LOQ | <LOQ | <LOQ  | 2                 | <LOQ | <LOQ | <LOQ  | 2                         | <LOQ | <LOQ | <LOQ | 0                 | <LOQ | <LOQ | <LOQ |
| 26+29    | 8                    | <LOQ | <LOQ | 0.55  | 8                 | <LOQ | <LOQ | 1.08  | 7                         | <LOQ | <LOQ | 0.62 | 10                | <LOQ | <LOQ | 0.86 |
| 27       | 6                    | <LOQ | <LOQ | 0.16  | 6                 | <LOQ | <LOQ | 0.12  | 5                         | <LOQ | <LOQ | <LOQ | 8                 | <LOQ | <LOQ | 0.23 |
| 31       | 16                   | <LOQ | <LOQ | 2.78  | 14                | <LOQ | <LOQ | 3.56  | 12                        | <LOQ | <LOQ | 3.92 | 4                 | <LOQ | <LOQ | <LOQ |
| 32       | 4                    | <LOQ | <LOQ | <LOQ  | 10                | <LOQ | <LOQ | 0.62  | 7                         | <LOQ | <LOQ | 0.55 | 10                | <LOQ | <LOQ | 0.51 |

Table S9, continued

| Congener    | East Chicago (urban) |      |      |       |                   |      |      |       | Columbus Junction (rural) |      |      |       |                   |      |      |       |
|-------------|----------------------|------|------|-------|-------------------|------|------|-------|---------------------------|------|------|-------|-------------------|------|------|-------|
|             | Mothers (n = 50)     |      |      |       | Children (n = 50) |      |      |       | Mothers (n = 43)          |      |      |       | Children (n = 49) |      |      |       |
|             | Det                  | Med  | 5%   | 95%   | Det               | Med  | 5%   | 95%   | Det                       | Med  | 5%   | 95%   | Det               | Med  | 5%   | 95%   |
| 34          | 2                    | <LOQ | <LOQ | <LOQ  | 2                 | <LOQ | <LOQ | <LOQ  | 2                         | <LOQ | <LOQ | <LOQ  | 0                 | <LOQ | <LOQ | <LOQ  |
| 35          | 8                    | <LOQ | <LOQ | 0.74  | 2                 | <LOQ | <LOQ | <LOQ  | 0                         | <LOQ | <LOQ | <LOQ  | 4                 | <LOQ | <LOQ | <LOQ  |
| 36          | 6                    | <LOQ | <LOQ | 0.28  | 0                 | <LOQ | <LOQ | <LOQ  | 2                         | <LOQ | <LOQ | <LOQ  | 0                 | <LOQ | <LOQ | <LOQ  |
| 37          | 16                   | <LOQ | <LOQ | 4.58  | 12                | <LOQ | <LOQ | 2.25  | 12                        | <LOQ | <LOQ | 3.47  | 6                 | <LOQ | <LOQ | 0.73  |
| 38          | 6                    | <LOQ | <LOQ | 0.14  | 0                 | <LOQ | <LOQ | <LOQ  | 0                         | <LOQ | <LOQ | <LOQ  | 2                 | <LOQ | <LOQ | <LOQ  |
| 40+41+71    | 10                   | <LOQ | <LOQ | 1.26  | 4                 | <LOQ | <LOQ | <LOQ  | 7                         | <LOQ | <LOQ | 1.25  | 8                 | <LOQ | <LOQ | 1.3   |
| 42+59+62+75 | 6                    | <LOQ | <LOQ | 0.51  | 2                 | <LOQ | <LOQ | <LOQ  | 0                         | <LOQ | <LOQ | <LOQ  | 0                 | <LOQ | <LOQ | <LOQ  |
| 43+73       | 8                    | <LOQ | <LOQ | 1.56  | 4                 | <LOQ | <LOQ | <LOQ  | 5                         | <LOQ | <LOQ | <LOQ  | 2                 | <LOQ | <LOQ | <LOQ  |
| 44+47+65    | 12                   | <LOQ | <LOQ | 2.73  | 12                | <LOQ | <LOQ | 5.09  | 14                        | <LOQ | <LOQ | 8.02  | 10                | <LOQ | <LOQ | 4.09  |
| 45+51       | 8                    | <LOQ | <LOQ | 0.82  | 2                 | <LOQ | <LOQ | <LOQ  | 7                         | <LOQ | <LOQ | 0.63  | 2                 | <LOQ | <LOQ | <LOQ  |
| 46          | 2                    | <LOQ | <LOQ | <LOQ  | 4                 | <LOQ | <LOQ | <LOQ  | 0                         | <LOQ | <LOQ | <LOQ  | 0                 | <LOQ | <LOQ | <LOQ  |
| 48          | 8                    | <LOQ | <LOQ | 0.78  | 0                 | <LOQ | <LOQ | <LOQ  | 9                         | <LOQ | <LOQ | 1.08  | 0                 | <LOQ | <LOQ | <LOQ  |
| 49+69       | 8                    | <LOQ | <LOQ | 1.35  | 16                | <LOQ | <LOQ | 2.79  | 12                        | <LOQ | <LOQ | 3.75  | 12                | <LOQ | <LOQ | 2.1   |
| 50+53       | 4                    | <LOQ | <LOQ | <LOQ  | 4                 | <LOQ | <LOQ | <LOQ  | 5                         | <LOQ | <LOQ | <LOQ  | 6                 | <LOQ | <LOQ | 0.57  |
| 52          | 6                    | <LOQ | <LOQ | 3.19  | 6                 | <LOQ | <LOQ | 5.73  | 9                         | <LOQ | <LOQ | 21.6  | 6                 | <LOQ | <LOQ | 4.6   |
| 55          | 6                    | <LOQ | <LOQ | 0.42  | 4                 | <LOQ | <LOQ | <LOQ  | 9                         | <LOQ | <LOQ | 1.51  | 6                 | <LOQ | <LOQ | 0.54  |
| 56          | 18                   | <LOQ | <LOQ | 2.83  | 18                | <LOQ | <LOQ | 2.85  | 28                        | <LOQ | <LOQ | 3.06  | 18                | <LOQ | <LOQ | 2.39  |
| 57          | 2                    | <LOQ | <LOQ | <LOQ  | 4                 | <LOQ | <LOQ | <LOQ  | 2                         | <LOQ | <LOQ | <LOQ  | 6                 | <LOQ | <LOQ | 0.36  |
| 58          | 2                    | <LOQ | <LOQ | <LOQ  | 2                 | <LOQ | <LOQ | <LOQ  | 2                         | <LOQ | <LOQ | <LOQ  | 2                 | <LOQ | <LOQ | <LOQ  |
| 60          | 26                   | <LOQ | <LOQ | 1.81  | 18                | <LOQ | <LOQ | 2.34  | 28                        | <LOQ | <LOQ | 2.72  | 16                | <LOQ | <LOQ | 2.33  |
| 61+70+74+76 | 32                   | <LOQ | <LOQ | 17.87 | 10                | <LOQ | <LOQ | 15.05 | 51                        | 7.11 | <LOQ | 25.52 | 16                | <LOQ | <LOQ | 19.45 |
| 63          | 4                    | <LOQ | <LOQ | <LOQ  | 2                 | <LOQ | <LOQ | <LOQ  | 5                         | <LOQ | <LOQ | <LOQ  | 2                 | <LOQ | <LOQ | <LOQ  |
| 64          | 10                   | <LOQ | <LOQ | 1.35  | 8                 | <LOQ | <LOQ | 1.5   | 14                        | <LOQ | <LOQ | 2.77  | 8                 | <LOQ | <LOQ | 1.36  |
| 66          | 50                   | 0.94 | <LOQ | 7.94  | 38                | <LOQ | <LOQ | 8.57  | 49                        | <LOQ | <LOQ | 6.81  | 35                | <LOQ | <LOQ | 8.6   |
| 67          | 2                    | <LOQ | <LOQ | <LOQ  | 4                 | <LOQ | <LOQ | <LOQ  | 5                         | <LOQ | <LOQ | <LOQ  | 4                 | <LOQ | <LOQ | <LOQ  |
| 68          | 0                    | <LOQ | <LOQ | <LOQ  | 6                 | <LOQ | <LOQ | 0.4   | 2                         | <LOQ | <LOQ | <LOQ  | 8                 | <LOQ | <LOQ | 0.87  |
| 72          | 2                    | <LOQ | <LOQ | <LOQ  | 4                 | <LOQ | <LOQ | <LOQ  | 2                         | <LOQ | <LOQ | <LOQ  | 2                 | <LOQ | <LOQ | <LOQ  |
| 77          | 6                    | <LOQ | <LOQ | 1.2   | 10                | <LOQ | <LOQ | 2.14  | 16                        | <LOQ | <LOQ | 7.99  | 16                | <LOQ | <LOQ | 7.87  |
| 79          | 0                    | <LOQ | <LOQ | <LOQ  | 2                 | <LOQ | <LOQ | <LOQ  | 5                         | <LOQ | <LOQ | <LOQ  | 0                 | <LOQ | <LOQ | <LOQ  |
| 80          | 6                    | <LOQ | <LOQ | 0.29  | 0                 | <LOQ | <LOQ | <LOQ  | 5                         | <LOQ | <LOQ | <LOQ  | 4                 | <LOQ | <LOQ | <LOQ  |
| 82          | 10                   | <LOQ | <LOQ | 1.19  | 4                 | <LOQ | <LOQ | <LOQ  | 5                         | <LOQ | <LOQ | <LOQ  | 4                 | <LOQ | <LOQ | <LOQ  |
| 83+99       | 94                   | 3.98 | 0.72 | 10.46 | 58                | 2.57 | <LOQ | 9.02  | 86                        | 4.23 | <LOQ | 9.73  | 51                | 1.86 | <LOQ | 6.91  |
| 84          | 2                    | <LOQ | <LOQ | <LOQ  | 4                 | <LOQ | <LOQ | <LOQ  | 7                         | <LOQ | <LOQ | 3.56  | 6                 | <LOQ | <LOQ | 0.91  |

Table S9, continued

| Congener             | East Chicago (urban) |      |      |       |                   |      |      |       | Columbus Junction (rural) |      |      |       |                   |      |      |       |
|----------------------|----------------------|------|------|-------|-------------------|------|------|-------|---------------------------|------|------|-------|-------------------|------|------|-------|
|                      | Mothers (n = 50)     |      |      |       | Children (n = 50) |      |      |       | Mothers (n = 43)          |      |      |       | Children (n = 49) |      |      |       |
|                      | Det                  | Med  | 5%   | 95%   | Det               | Med  | 5%   | 95%   | Det                       | Med  | 5%   | 95%   | Det               | Med  | 5%   | 95%   |
| 85+116+117           | 16                   | <LOQ | <LOQ | 2.1   | 6                 | <LOQ | <LOQ | 1.05  | 19                        | <LOQ | <LOQ | 2.21  | 12                | <LOQ | <LOQ | 1.53  |
| 86+87+97+109+119+125 | 2                    | <LOQ | <LOQ | <LOQ  | 2                 | <LOQ | <LOQ | <LOQ  | 7                         | <LOQ | <LOQ | 3.68  | 6                 | <LOQ | <LOQ | 2.71  |
| 88+91                | 4                    | <LOQ | <LOQ | <LOQ  | 0                 | <LOQ | <LOQ | <LOQ  | 7                         | <LOQ | <LOQ | 1.45  | 6                 | <LOQ | <LOQ | 1.05  |
| 89                   | 4                    | <LOQ | <LOQ | <LOQ  | 0                 | <LOQ | <LOQ | <LOQ  | 0                         | <LOQ | <LOQ | <LOQ  | 2                 | <LOQ | <LOQ | <LOQ  |
| 90+101+113           | 4                    | <LOQ | <LOQ | <LOQ  | 4                 | <LOQ | <LOQ | <LOQ  | 7                         | <LOQ | <LOQ | 8.05  | 6                 | <LOQ | <LOQ | 2.52  |
| 92                   | 8                    | <LOQ | <LOQ | 1.1   | 6                 | <LOQ | <LOQ | 0.47  | 9                         | <LOQ | <LOQ | 1.51  | 4                 | <LOQ | <LOQ | <LOQ  |
| 93+100               | 2                    | <LOQ | <LOQ | <LOQ  | 0                 | <LOQ | <LOQ | <LOQ  | 0                         | <LOQ | <LOQ | <LOQ  | 8                 | <LOQ | <LOQ | 0.77  |
| 94                   | 2                    | <LOQ | <LOQ | <LOQ  | 2                 | <LOQ | <LOQ | <LOQ  | 2                         | <LOQ | <LOQ | <LOQ  | 2                 | <LOQ | <LOQ | <LOQ  |
| 95                   | 4                    | <LOQ | <LOQ | <LOQ  | 4                 | <LOQ | <LOQ | <LOQ  | 7                         | <LOQ | <LOQ | 12.53 | 4                 | <LOQ | <LOQ | <LOQ  |
| 96                   | 2                    | <LOQ | <LOQ | <LOQ  | 4                 | <LOQ | <LOQ | <LOQ  | 2                         | <LOQ | <LOQ | <LOQ  | 2                 | <LOQ | <LOQ | <LOQ  |
| 98+102               | 4                    | <LOQ | <LOQ | <LOQ  | 2                 | <LOQ | <LOQ | <LOQ  | 2                         | <LOQ | <LOQ | <LOQ  | 4                 | <LOQ | <LOQ | <LOQ  |
| 103                  | 0                    | <LOQ | <LOQ | <LOQ  | 0                 | <LOQ | <LOQ | <LOQ  | 2                         | <LOQ | <LOQ | <LOQ  | 0                 | <LOQ | <LOQ | <LOQ  |
| 104                  | 2                    | <LOQ | <LOQ | <LOQ  | 4                 | <LOQ | <LOQ | <LOQ  | 0                         | <LOQ | <LOQ | <LOQ  | 2                 | <LOQ | <LOQ | <LOQ  |
| 105                  | 32                   | <LOQ | <LOQ | 5.47  | 14                | <LOQ | <LOQ | 5.2   | 44                        | <LOQ | <LOQ | 5.73  | 10                | <LOQ | <LOQ | 4.42  |
| 107+123              | 16                   | <LOQ | <LOQ | 1.04  | 0                 | <LOQ | <LOQ | <LOQ  | 9                         | <LOQ | <LOQ | 1.34  | 0                 | <LOQ | <LOQ | <LOQ  |
| 108+124              | 2                    | <LOQ | <LOQ | <LOQ  | 4                 | <LOQ | <LOQ | <LOQ  | 0                         | <LOQ | <LOQ | <LOQ  | 2                 | <LOQ | <LOQ | <LOQ  |
| 110+115              | 10                   | <LOQ | <LOQ | 12.61 | 12                | <LOQ | <LOQ | 13.29 | 21                        | <LOQ | <LOQ | 12.36 | 8                 | <LOQ | <LOQ | 4.59  |
| 111                  | 2                    | <LOQ | <LOQ | <LOQ  | 2                 | <LOQ | <LOQ | <LOQ  | 7                         | <LOQ | <LOQ | 0.43  | 0                 | <LOQ | <LOQ | <LOQ  |
| 112                  | 6                    | <LOQ | <LOQ | 0.79  | 6                 | <LOQ | <LOQ | 0.65  | 12                        | <LOQ | <LOQ | 1.98  | 8                 | <LOQ | <LOQ | 1.17  |
| 114                  | 24                   | <LOQ | <LOQ | 1.07  | 8                 | <LOQ | <LOQ | 0.48  | 12                        | <LOQ | <LOQ | 1.03  | 4                 | <LOQ | <LOQ | <LOQ  |
| 118                  | 84                   | 5.35 | <LOQ | 17.03 | 42                | <LOQ | <LOQ | 11.27 | 84                        | 6.59 | <LOQ | 22.70 | 43                | <LOQ | <LOQ | 10.10 |
| 120                  | 2                    | <LOQ | <LOQ | <LOQ  | 2                 | <LOQ | <LOQ | <LOQ  | 0                         | <LOQ | <LOQ | <LOQ  | 0                 | <LOQ | <LOQ | <LOQ  |
| 121                  | 8                    | <LOQ | <LOQ | 0.34  | 2                 | <LOQ | <LOQ | <LOQ  | 0                         | <LOQ | <LOQ | <LOQ  | 0                 | <LOQ | <LOQ | <LOQ  |
| 122                  | 2                    | <LOQ | <LOQ | <LOQ  | 2                 | <LOQ | <LOQ | <LOQ  | 2                         | <LOQ | <LOQ | <LOQ  | 6                 | <LOQ | <LOQ | 0.42  |
| 126                  | 8                    | <LOQ | <LOQ | 0.75  | 0                 | <LOQ | <LOQ | <LOQ  | 5                         | <LOQ | <LOQ | <LOQ  | 0                 | <LOQ | <LOQ | <LOQ  |
| 128+166              | 8                    | <LOQ | <LOQ | 0.71  | 6                 | <LOQ | <LOQ | 0.48  | 7                         | <LOQ | <LOQ | 0.58  | 4                 | <LOQ | <LOQ | <LOQ  |
| 129+138+163          | 94                   | 8.89 | 1.01 | 27.12 | 68                | 3.21 | <LOQ | 13.44 | 100                       | 8.83 | 4.25 | 22.18 | 61                | 2.56 | <LOQ | 9.08  |
| 130                  | 8                    | <LOQ | <LOQ | 0.81  | 4                 | <LOQ | <LOQ | <LOQ  | 9                         | <LOQ | <LOQ | 0.85  | 2                 | <LOQ | <LOQ | <LOQ  |
| 131                  | 2                    | <LOQ | <LOQ | <LOQ  | 0                 | <LOQ | <LOQ | <LOQ  | 0                         | <LOQ | <LOQ | <LOQ  | 2                 | <LOQ | <LOQ | <LOQ  |
| 132                  | 4                    | <LOQ | <LOQ | <LOQ  | 6                 | <LOQ | <LOQ | 1.05  | 5                         | <LOQ | <LOQ | <LOQ  | 0                 | <LOQ | <LOQ | <LOQ  |
| 133                  | 0                    | <LOQ | <LOQ | <LOQ  | 2                 | <LOQ | <LOQ | <LOQ  | 5                         | <LOQ | <LOQ | <LOQ  | 2                 | <LOQ | <LOQ | <LOQ  |
| 134+143              | 4                    | <LOQ | <LOQ | <LOQ  | 2                 | <LOQ | <LOQ | <LOQ  | 2                         | <LOQ | <LOQ | <LOQ  | 0                 | <LOQ | <LOQ | <LOQ  |
| 135+151              | 4                    | <LOQ | <LOQ | <LOQ  | 0                 | <LOQ | <LOQ | <LOQ  | 9                         | <LOQ | <LOQ | 1.82  | 4                 | <LOQ | <LOQ | <LOQ  |

Table S9, continued

| Congener | East Chicago (urban) |      |      |       |                   |      |      |       | Columbus Junction (rural) |       |      |       |                   |      |      |       |
|----------|----------------------|------|------|-------|-------------------|------|------|-------|---------------------------|-------|------|-------|-------------------|------|------|-------|
|          | Mothers (n = 50)     |      |      |       | Children (n = 50) |      |      |       | Mothers (n = 43)          |       |      |       | Children (n = 49) |      |      |       |
|          | Det                  | Med  | 5%   | 95%   | Det               | Med  | 5%   | 95%   | Det                       | Med   | 5%   | 95%   | Det               | Med  | 5%   | 95%   |
| 136      | 2                    | <LOQ | <LOQ | <LOQ  | 0                 | <LOQ | <LOQ | <LOQ  | 7                         | <LOQ  | <LOQ | 1.09  | 4                 | <LOQ | <LOQ | <LOQ  |
| 137+164  | 20                   | <LOQ | <LOQ | 1.63  | 4                 | <LOQ | <LOQ | <LOQ  | 19                        | <LOQ  | <LOQ | 2.02  | 8                 | <LOQ | <LOQ | 1.2   |
| 139+140  | 8                    | <LOQ | <LOQ | 0.49  | 4                 | <LOQ | <LOQ | <LOQ  | 2                         | <LOQ  | <LOQ | <LOQ  | 4                 | <LOQ | <LOQ | <LOQ  |
| 141      | 2                    | <LOQ | <LOQ | <LOQ  | 2                 | <LOQ | <LOQ | <LOQ  | 2                         | <LOQ  | <LOQ | <LOQ  | 0                 | <LOQ | <LOQ | <LOQ  |
| 142      | 0                    | <LOQ | <LOQ | <LOQ  | 0                 | <LOQ | <LOQ | <LOQ  | 0                         | <LOQ  | <LOQ | <LOQ  | 2                 | <LOQ | <LOQ | <LOQ  |
| 144      | 4                    | <LOQ | <LOQ | <LOQ  | 2                 | <LOQ | <LOQ | <LOQ  | 0                         | <LOQ  | <LOQ | <LOQ  | 2                 | <LOQ | <LOQ | <LOQ  |
| 145      | 2                    | <LOQ | <LOQ | <LOQ  | 6                 | <LOQ | <LOQ | 0.16  | 2                         | <LOQ  | <LOQ | <LOQ  | 2                 | <LOQ | <LOQ | <LOQ  |
| 146      | 76                   | 1.24 | <LOQ | 4.06  | 22                | <LOQ | <LOQ | 1.89  | 74                        | 1.44  | <LOQ | 3.61  | 24                | <LOQ | <LOQ | 2.29  |
| 147+149  | 4                    | <LOQ | <LOQ | <LOQ  | 0                 | <LOQ | <LOQ | <LOQ  | 9                         | <LOQ  | <LOQ | 2.58  | 6                 | <LOQ | <LOQ | 0.93  |
| 148      | 2                    | <LOQ | <LOQ | <LOQ  | 0                 | <LOQ | <LOQ | <LOQ  | 2                         | <LOQ  | <LOQ | <LOQ  | 2                 | <LOQ | <LOQ | <LOQ  |
| 150      | 2                    | <LOQ | <LOQ | <LOQ  | 0                 | <LOQ | <LOQ | <LOQ  | 0                         | <LOQ  | <LOQ | <LOQ  | 0                 | <LOQ | <LOQ | <LOQ  |
| 152      | 2                    | <LOQ | <LOQ | <LOQ  | 0                 | <LOQ | <LOQ | <LOQ  | 0                         | <LOQ  | <LOQ | <LOQ  | 0                 | <LOQ | <LOQ | <LOQ  |
| 153+168  | 98                   | 8.28 | 2.59 | 32.82 | 78                | 2.92 | <LOQ | 10.75 | 100                       | 10.96 | 4.14 | 26.51 | 80                | 2.97 | <LOQ | 11.12 |
| 155      | 0                    | <LOQ | <LOQ | <LOQ  | 2                 | <LOQ | <LOQ | <LOQ  | 2                         | <LOQ  | <LOQ | <LOQ  | 0                 | <LOQ | <LOQ | <LOQ  |
| 156+157  | 52                   | 1.27 | <LOQ | 5.87  | 8                 | <LOQ | <LOQ | 2.96  | 65                        | 1.91  | <LOQ | 5.24  | 10                | <LOQ | <LOQ | 2.68  |
| 158      | 12                   | <LOQ | <LOQ | 0.61  | 0                 | <LOQ | <LOQ | <LOQ  | 7                         | <LOQ  | <LOQ | 0.50  | 10                | <LOQ | <LOQ | 0.85  |
| 159      | 0                    | <LOQ | <LOQ | <LOQ  | 2                 | <LOQ | <LOQ | <LOQ  | 0                         | <LOQ  | <LOQ | <LOQ  | 0                 | <LOQ | <LOQ | <LOQ  |
| 160      | 8                    | <LOQ | <LOQ | 1.84  | 6                 | <LOQ | <LOQ | 0.23  | 9                         | <LOQ  | <LOQ | 5.12  | 4                 | <LOQ | <LOQ | <LOQ  |
| 161      | 6                    | <LOQ | <LOQ | 0.26  | 2                 | <LOQ | <LOQ | <LOQ  | 9                         | <LOQ  | <LOQ | 0.69  | 2                 | <LOQ | <LOQ | <LOQ  |
| 162      | 2                    | <LOQ | <LOQ | <LOQ  | 0                 | <LOQ | <LOQ | <LOQ  | 0                         | <LOQ  | <LOQ | <LOQ  | 6                 | <LOQ | <LOQ | 0.51  |
| 165      | 4                    | <LOQ | <LOQ | <LOQ  | 0                 | <LOQ | <LOQ | <LOQ  | 0                         | <LOQ  | <LOQ | <LOQ  | 2                 | <LOQ | <LOQ | <LOQ  |
| 167      | 26                   | <LOQ | <LOQ | 1.27  | 10                | <LOQ | <LOQ | 0.69  | 30                        | <LOQ  | <LOQ | 1.31  | 8                 | <LOQ | <LOQ | 0.88  |
| 169      | 0                    | <LOQ | <LOQ | <LOQ  | 2                 | <LOQ | <LOQ | <LOQ  | 2                         | <LOQ  | <LOQ | <LOQ  | 0                 | <LOQ | <LOQ | <LOQ  |
| 170      | 72                   | 1.97 | <LOQ | 7.68  | 20                | <LOQ | <LOQ | 2.79  | 84                        | 2.58  | <LOQ | 8.37  | 16                | <LOQ | <LOQ | 2.77  |
| 171+173  | 20                   | <LOQ | <LOQ | 1.25  | 6                 | <LOQ | <LOQ | 0.67  | 16                        | <LOQ  | <LOQ | 1.46  | 14                | <LOQ | <LOQ | 1.09  |
| 172      | 4                    | <LOQ | <LOQ | <LOQ  | 0                 | <LOQ | <LOQ | <LOQ  | 12                        | <LOQ  | <LOQ | 1.36  | 6                 | <LOQ | <LOQ | 0.68  |
| 174      | 4                    | <LOQ | <LOQ | <LOQ  | 0                 | <LOQ | <LOQ | <LOQ  | 0                         | <LOQ  | <LOQ | <LOQ  | 2                 | <LOQ | <LOQ | <LOQ  |
| 175      | 6                    | <LOQ | <LOQ | 0.29  | 6                 | <LOQ | <LOQ | 0.58  | 0                         | <LOQ  | <LOQ | <LOQ  | 0                 | <LOQ | <LOQ | <LOQ  |
| 176      | 2                    | <LOQ | <LOQ | <LOQ  | 4                 | <LOQ | <LOQ | <LOQ  | 0                         | <LOQ  | <LOQ | <LOQ  | 2                 | <LOQ | <LOQ | <LOQ  |
| 177      | 16                   | <LOQ | <LOQ | 1.49  | 10                | <LOQ | <LOQ | 1.37  | 28                        | <LOQ  | <LOQ | 1.7   | 10                | <LOQ | <LOQ | 1.31  |
| 178      | 20                   | <LOQ | <LOQ | 1.81  | 0                 | <LOQ | <LOQ | <LOQ  | 23                        | <LOQ  | <LOQ | 2.31  | 6                 | <LOQ | <LOQ | 0.32  |
| 179      | 12                   | <LOQ | <LOQ | 0.95  | 4                 | <LOQ | <LOQ | <LOQ  | 0                         | <LOQ  | <LOQ | <LOQ  | 0                 | <LOQ | <LOQ | <LOQ  |
| 180+193  | 98                   | 4.44 | 1.78 | 24.77 | 54                | 1.1  | <LOQ | 5.92  | 100                       | 6.49  | 3.32 | 27.96 | 61                | 1.32 | <LOQ | 6.95  |



Table S9, continued

| Congener | East Chicago (urban) |       |       |       |                   |       |      |       | Columbus Junction (rural) |       |       |       |                   |       |      |       |
|----------|----------------------|-------|-------|-------|-------------------|-------|------|-------|---------------------------|-------|-------|-------|-------------------|-------|------|-------|
|          | Mothers (n = 50)     |       |       |       | Children (n = 50) |       |      |       | Mothers (n = 43)          |       |       |       | Children (n = 49) |       |      |       |
|          | Det                  | Med   | 5%    | 95%   | Det               | Med   | 5%   | 95%   | Det                       | Med   | 5%    | 95%   | Det               | Med   | 5%   | 95%   |
| 181      | 4                    | <LOQ  | <LOQ  | <LOQ  | 0                 | <LOQ  | <LOQ | <LOQ  | 2                         | <LOQ  | <LOQ  | <LOQ  | 0                 | <LOQ  | <LOQ | <LOQ  |
| 182      | 8                    | <LOQ  | <LOQ  | 0.63  | 8                 | <LOQ  | <LOQ | 0.81  | 9                         | <LOQ  | <LOQ  | 2.07  | 4                 | <LOQ  | <LOQ | <LOQ  |
| 183+185  | 36                   | <LOQ  | <LOQ  | 3.21  | 6                 | <LOQ  | <LOQ | 0.78  | 44                        | <LOQ  | <LOQ  | 2.85  | 2                 | <LOQ  | <LOQ | <LOQ  |
| 184      | 2                    | <LOQ  | <LOQ  | <LOQ  | 8                 | <LOQ  | <LOQ | 0.71  | 2                         | <LOQ  | <LOQ  | <LOQ  | 0                 | <LOQ  | <LOQ | <LOQ  |
| 186      | 2                    | <LOQ  | <LOQ  | <LOQ  | 6                 | <LOQ  | <LOQ | 0.45  | 0                         | <LOQ  | <LOQ  | <LOQ  | 4                 | <LOQ  | <LOQ | <LOQ  |
| 187      | 84                   | 1.75  | <LOQ  | 7.75  | 20                | <LOQ  | <LOQ | 2.05  | 86                        | 2.80  | <LOQ  | 10.34 | 27                | <LOQ  | <LOQ | 4.17  |
| 188      | 0                    | <LOQ  | <LOQ  | <LOQ  | 4                 | <LOQ  | <LOQ | <LOQ  | 2                         | <LOQ  | <LOQ  | <LOQ  | 0                 | <LOQ  | <LOQ | <LOQ  |
| 189      | 0                    | <LOQ  | <LOQ  | <LOQ  | 0                 | <LOQ  | <LOQ | <LOQ  | 2                         | <LOQ  | <LOQ  | <LOQ  | 0                 | <LOQ  | <LOQ | <LOQ  |
| 190      | 22                   | <LOQ  | <LOQ  | 1.21  | 10                | <LOQ  | <LOQ | 0.68  | 28                        | <LOQ  | <LOQ  | 1.73  | 8                 | <LOQ  | <LOQ | 0.78  |
| 191      | 4                    | <LOQ  | <LOQ  | <LOQ  | 0                 | <LOQ  | <LOQ | <LOQ  | 5                         | <LOQ  | <LOQ  | <LOQ  | 2                 | <LOQ  | <LOQ | <LOQ  |
| 192      | 0                    | <LOQ  | <LOQ  | <LOQ  | 2                 | <LOQ  | <LOQ | <LOQ  | 0                         | <LOQ  | <LOQ  | <LOQ  | 2                 | <LOQ  | <LOQ | <LOQ  |
| 194      | 20                   | <LOQ  | <LOQ  | 2.8   | 2                 | <LOQ  | <LOQ | <LOQ  | 42                        | <LOQ  | <LOQ  | 3.33  | 4                 | <LOQ  | <LOQ | <LOQ  |
| 195      | 10                   | <LOQ  | <LOQ  | 1.43  | 0                 | <LOQ  | <LOQ | <LOQ  | 7                         | <LOQ  | <LOQ  | 0.79  | 4                 | <LOQ  | <LOQ | <LOQ  |
| 196      | 12                   | <LOQ  | <LOQ  | 1.83  | 0                 | <LOQ  | <LOQ | <LOQ  | 19                        | <LOQ  | <LOQ  | 2.48  | 2                 | <LOQ  | <LOQ | <LOQ  |
| 197+200  | 12                   | <LOQ  | <LOQ  | 0.9   | 4                 | <LOQ  | <LOQ | <LOQ  | 2                         | <LOQ  | <LOQ  | <LOQ  | 6                 | <LOQ  | <LOQ | 0.58  |
| 198+199  | 44                   | <LOQ  | <LOQ  | 6.16  | 4                 | <LOQ  | <LOQ | <LOQ  | 63                        | 1.85  | <LOQ  | 6.27  | 8                 | <LOQ  | <LOQ | 2.32  |
| 201      | 2                    | <LOQ  | <LOQ  | <LOQ  | 2                 | <LOQ  | <LOQ | <LOQ  | 5                         | <LOQ  | <LOQ  | <LOQ  | 0                 | <LOQ  | <LOQ | <LOQ  |
| 202      | 24                   | <LOQ  | <LOQ  | 1.45  | 6                 | <LOQ  | <LOQ | 0.37  | 30                        | <LOQ  | <LOQ  | 1.43  | 4                 | <LOQ  | <LOQ | <LOQ  |
| 203      | 36                   | <LOQ  | <LOQ  | 3.65  | 4                 | <LOQ  | <LOQ | <LOQ  | 58                        | 0.99  | <LOQ  | 3.09  | 8                 | <LOQ  | <LOQ | 1.14  |
| 204      | 4                    | <LOQ  | <LOQ  | <LOQ  | 0                 | <LOQ  | <LOQ | <LOQ  | 5                         | <LOQ  | <LOQ  | <LOQ  | 0                 | <LOQ  | <LOQ | <LOQ  |
| 205      | 8                    | <LOQ  | <LOQ  | 1.41  | 0                 | <LOQ  | <LOQ | <LOQ  | 0                         | <LOQ  | <LOQ  | <LOQ  | 0                 | <LOQ  | <LOQ | <LOQ  |
| 206      | 18                   | <LOQ  | <LOQ  | 1.93  | 2                 | <LOQ  | <LOQ | <LOQ  | 26                        | <LOQ  | <LOQ  | 3.07  | 0                 | <LOQ  | <LOQ | <LOQ  |
| 207      | 2                    | <LOQ  | <LOQ  | <LOQ  | 0                 | <LOQ  | <LOQ | <LOQ  | 0                         | <LOQ  | <LOQ  | <LOQ  | 0                 | <LOQ  | <LOQ | <LOQ  |
| 208      | 6                    | <LOQ  | <LOQ  | 0.5   | 2                 | <LOQ  | <LOQ | <LOQ  | 9                         | <LOQ  | <LOQ  | 0.92  | 0                 | <LOQ  | <LOQ | <LOQ  |
| 209      | 34                   | <LOQ  | <LOQ  | 0.75  | 0                 | <LOQ  | <LOQ | <LOQ  | 42                        | <LOQ  | <LOQ  | 1.4   | 4                 | <LOQ  | <LOQ | <LOQ  |
| ΣPCBs    | 100                  | 60.39 | 16.58 | 216.8 | 100               | 24.51 | 3.69 | 122.8 | 100                       | 73.35 | 30.65 | 243.8 | 98                | 26.06 | 1.31 | 111.4 |

Note: Detections are reported as percent of the subgroup. PCBs not listed were not detected in any samples.

Table S10 Frequency of detection (Det), median (Med) and range (5th-95th percentile) of PCBs (ng/g fresh weight) detected in mothers and children from East Chicago and Columbus Junction.

| Congener | East Chicago (urban) |       |      |        |                   |      |      |        | Columbus Junction (rural) |       |      |        |                   |      |      |        |
|----------|----------------------|-------|------|--------|-------------------|------|------|--------|---------------------------|-------|------|--------|-------------------|------|------|--------|
|          | Mothers (n = 50)     |       |      |        | Children (n = 50) |      |      |        | Mothers (n = 43)          |       |      |        | Children (n = 49) |      |      |        |
|          | Det                  | Med   | 5%   | 95%    | Det               | Med  | 5%   | 95%    | Det                       | Med   | 5%   | 95%    | Det               | Med  | 5%   | 95%    |
| 1        | 10                   | <LOQ  | <LOQ | 0.0031 | 14                | <LOQ | <LOQ | 0.0028 | 5                         | <LOQ  | <LOQ | <LOQ   | 8                 | <LOQ | <LOQ | 0.0024 |
| 2        | 18                   | <LOQ  | <LOQ | 0.0082 | 18                | <LOQ | <LOQ | 0.0063 | 9                         | <LOQ  | <LOQ | 0.0027 | 8                 | <LOQ | <LOQ | 0.0019 |
| 3        | 12                   | <LOQ  | <LOQ | 0.022  | 20                | <LOQ | <LOQ | 0.01   | 2                         | <LOQ  | <LOQ | <LOQ   | 10                | <LOQ | <LOQ | 0.005  |
| 4        | 10                   | <LOQ  | <LOQ | 0.0049 | 6                 | <LOQ | <LOQ | 0.0016 | 2                         | <LOQ  | <LOQ | <LOQ   | 4                 | <LOQ | <LOQ | <LOQ   |
| 5        | 12                   | <LOQ  | <LOQ | 0.0019 | 10                | <LOQ | <LOQ | 0.0042 | 5                         | <LOQ  | <LOQ | <LOQ   | 0                 | <LOQ | <LOQ | <LOQ   |
| 6        | 16                   | <LOQ  | <LOQ | 0.0036 | 12                | <LOQ | <LOQ | 0.0046 | 12                        | <LOQ  | <LOQ | 0.0025 | 8                 | <LOQ | <LOQ | 0.0021 |
| 7        | 6                    | <LOQ  | <LOQ | 0.0036 | 6                 | <LOQ | <LOQ | 0.0033 | 7                         | <LOQ  | <LOQ | 0.0049 | 6                 | <LOQ | <LOQ | 0.0044 |
| 8        | 20                   | <LOQ  | <LOQ | 0.015  | 14                | <LOQ | <LOQ | 0.013  | 14                        | <LOQ  | <LOQ | 0.011  | 12                | <LOQ | <LOQ | 0.012  |
| 9        | 8                    | <LOQ  | <LOQ | 0.0021 | 12                | <LOQ | <LOQ | 0.0019 | 2                         | <LOQ  | <LOQ | <LOQ   | 4                 | <LOQ | <LOQ | <LOQ   |
| 10       | 10                   | <LOQ  | <LOQ | 0.0028 | 8                 | <LOQ | <LOQ | 0.0016 | 0                         | <LOQ  | <LOQ | <LOQ   | 4                 | <LOQ | <LOQ | <LOQ   |
| 11       | 30                   | <LOQ  | <LOQ | 0.064  | 34                | <LOQ | <LOQ | 0.057  | 26                        | <LOQ  | <LOQ | 0.042  | 16                | <LOQ | <LOQ | 0.039  |
| 12+13    | 24                   | <LOQ  | <LOQ | 0.0065 | 22                | <LOQ | <LOQ | 0.0076 | 14                        | <LOQ  | <LOQ | 0.0038 | 35                | <LOQ | <LOQ | 0.0043 |
| 14       | 4                    | <LOQ  | <LOQ | <LOQ   | 0                 | <LOQ | <LOQ | <LOQ   | 2                         | <LOQ  | <LOQ | <LOQ   | 0                 | <LOQ | <LOQ | <LOQ   |
| 15       | 24                   | <LOQ  | <LOQ | 0.018  | 24                | <LOQ | <LOQ | 0.016  | 19                        | <LOQ  | <LOQ | 0.009  | 16                | <LOQ | <LOQ | 0.0097 |
| 16       | 10                   | <LOQ  | <LOQ | 0.0048 | 4                 | <LOQ | <LOQ | <LOQ   | 9                         | <LOQ  | <LOQ | 0.0043 | 4                 | <LOQ | <LOQ | <LOQ   |
| 17       | 10                   | <LOQ  | <LOQ | 0.0025 | 8                 | <LOQ | <LOQ | 0.003  | 9                         | <LOQ  | <LOQ | 0.0064 | 12                | <LOQ | <LOQ | 0.0038 |
| 18+30    | 6                    | <LOQ  | <LOQ | 0.0036 | 6                 | <LOQ | <LOQ | 0.0036 | 7                         | <LOQ  | <LOQ | 0.014  | 6                 | <LOQ | <LOQ | 0.0032 |
| 19       | 0                    | <LOQ  | <LOQ | <LOQ   | 4                 | <LOQ | <LOQ | <LOQ   | 2                         | <LOQ  | <LOQ | <LOQ   | 2                 | <LOQ | <LOQ | <LOQ   |
| 20+28    | 54                   | 0.017 | <LOQ | 0.032  | 38                | <LOQ | <LOQ | 0.025  | 51                        | 0.017 | <LOQ | 0.048  | 33                | <LOQ | <LOQ | 0.036  |
| 21+33    | 14                   | <LOQ  | <LOQ | 0.02   | 4                 | <LOQ | <LOQ | <LOQ   | 14                        | <LOQ  | <LOQ | 0.02   | 0                 | <LOQ | <LOQ | <LOQ   |
| 22       | 36                   | <LOQ  | <LOQ | 0.0076 | 28                | <LOQ | <LOQ | 0.0069 | 33                        | <LOQ  | <LOQ | 0.0082 | 24                | <LOQ | <LOQ | 0.0061 |
| 23       | 10                   | <LOQ  | <LOQ | 0.0015 | 8                 | <LOQ | <LOQ | 0.0021 | 2                         | <LOQ  | <LOQ | <LOQ   | 12                | <LOQ | <LOQ | 0.0022 |
| 24       | 4                    | <LOQ  | <LOQ | <LOQ   | 2                 | <LOQ | <LOQ | <LOQ   | 5                         | <LOQ  | <LOQ | <LOQ   | 0                 | <LOQ | <LOQ | <LOQ   |
| 25       | 2                    | <LOQ  | <LOQ | <LOQ   | 2                 | <LOQ | <LOQ | <LOQ   | 2                         | <LOQ  | <LOQ | <LOQ   | 0                 | <LOQ | <LOQ | <LOQ   |

Table S10, continued

| Congener    | East Chicago (urban) |      |      |         |                   |      |      |         | Columbus Junction (rural) |       |      |        |                   |      |      |        |
|-------------|----------------------|------|------|---------|-------------------|------|------|---------|---------------------------|-------|------|--------|-------------------|------|------|--------|
|             | Mothers (n = 50)     |      |      |         | Children (n = 50) |      |      |         | Mothers (n = 43)          |       |      |        | Children (n = 49) |      |      |        |
|             | Det                  | Med  | 5%   | 95%     | Det               | Med  | 5%   | 95%     | Det                       | Med   | 5%   | 95%    | Det               | Med  | 5%   | 95%    |
| 26+29       | 8                    | <LOQ | <LOQ | 0.0041  | 8                 | <LOQ | <LOQ | 0.004   | 7                         | <LOQ  | <LOQ | 0.0038 | 10                | <LOQ | <LOQ | 0.0041 |
| 27          | 6                    | <LOQ | <LOQ | 0.001   | 6                 | <LOQ | <LOQ | 0.00059 | 5                         | <LOQ  | <LOQ | <LOQ   | 8                 | <LOQ | <LOQ | 0.0011 |
| 31          | 16                   | <LOQ | <LOQ | 0.016   | 14                | <LOQ | <LOQ | 0.016   | 12                        | <LOQ  | <LOQ | 0.02   | 4                 | <LOQ | <LOQ | <LOQ   |
| 32          | 4                    | <LOQ | <LOQ | <LOQ    | 10                | <LOQ | <LOQ | 0.0026  | 7                         | <LOQ  | <LOQ | 0.0028 | 10                | <LOQ | <LOQ | 0.0023 |
| 34          | 2                    | <LOQ | <LOQ | <LOQ    | 2                 | <LOQ | <LOQ | <LOQ    | 2                         | <LOQ  | <LOQ | <LOQ   | 0                 | <LOQ | <LOQ | <LOQ   |
| 35          | 8                    | <LOQ | <LOQ | 0.0043  | 2                 | <LOQ | <LOQ | <LOQ    | 0                         | <LOQ  | <LOQ | <LOQ   | 4                 | <LOQ | <LOQ | <LOQ   |
| 36          | 6                    | <LOQ | <LOQ | 0.0017  | 0                 | <LOQ | <LOQ | <LOQ    | 2                         | <LOQ  | <LOQ | <LOQ   | 0                 | <LOQ | <LOQ | <LOQ   |
| 37          | 16                   | <LOQ | <LOQ | 0.027   | 12                | <LOQ | <LOQ | 0.0098  | 12                        | <LOQ  | <LOQ | 0.023  | 6                 | <LOQ | <LOQ | 0.0036 |
| 38          | 6                    | <LOQ | <LOQ | 0.00077 | 0                 | <LOQ | <LOQ | <LOQ    | 0                         | <LOQ  | <LOQ | <LOQ   | 2                 | <LOQ | <LOQ | <LOQ   |
| 40+41+71    | 10                   | <LOQ | <LOQ | 0.0081  | 4                 | <LOQ | <LOQ | <LOQ    | 7                         | <LOQ  | <LOQ | 0.0085 | 8                 | <LOQ | <LOQ | 0.0069 |
| 42+59+62+75 | 6                    | <LOQ | <LOQ | 0.0039  | 2                 | <LOQ | <LOQ | <LOQ    | 0                         | <LOQ  | <LOQ | <LOQ   | 0                 | <LOQ | <LOQ | <LOQ   |
| 43+73       | 8                    | <LOQ | <LOQ | 0.0094  | 4                 | <LOQ | <LOQ | <LOQ    | 5                         | <LOQ  | <LOQ | <LOQ   | 2                 | <LOQ | <LOQ | <LOQ   |
| 44+47+65    | 12                   | <LOQ | <LOQ | 0.019   | 12                | <LOQ | <LOQ | 0.021   | 14                        | <LOQ  | <LOQ | 0.055  | 10                | <LOQ | <LOQ | 0.02   |
| 45+51       | 8                    | <LOQ | <LOQ | 0.0053  | 2                 | <LOQ | <LOQ | <LOQ    | 7                         | <LOQ  | <LOQ | 0.0049 | 2                 | <LOQ | <LOQ | <LOQ   |
| 46          | 2                    | <LOQ | <LOQ | <LOQ    | 4                 | <LOQ | <LOQ | <LOQ    | 0                         | <LOQ  | <LOQ | <LOQ   | 0                 | <LOQ | <LOQ | <LOQ   |
| 48          | 8                    | <LOQ | <LOQ | 0.0053  | 0                 | <LOQ | <LOQ | <LOQ    | 9                         | <LOQ  | <LOQ | 0.0056 | 0                 | <LOQ | <LOQ | <LOQ   |
| 49+69       | 8                    | <LOQ | <LOQ | 0.0094  | 16                | <LOQ | <LOQ | 0.013   | 12                        | <LOQ  | <LOQ | 0.025  | 12                | <LOQ | <LOQ | 0.01   |
| 50+53       | 4                    | <LOQ | <LOQ | <LOQ    | 4                 | <LOQ | <LOQ | <LOQ    | 5                         | <LOQ  | <LOQ | <LOQ   | 6                 | <LOQ | <LOQ | 0.0025 |
| 52          | 6                    | <LOQ | <LOQ | 0.019   | 6                 | <LOQ | <LOQ | 0.021   | 9                         | <LOQ  | <LOQ | 0.13   | 6                 | <LOQ | <LOQ | 0.028  |
| 55          | 6                    | <LOQ | <LOQ | 0.0024  | 4                 | <LOQ | <LOQ | <LOQ    | 9                         | <LOQ  | <LOQ | 0.0098 | 6                 | <LOQ | <LOQ | 0.0026 |
| 56          | 18                   | <LOQ | <LOQ | 0.015   | 18                | <LOQ | <LOQ | 0.013   | 28                        | <LOQ  | <LOQ | 0.019  | 18                | <LOQ | <LOQ | 0.014  |
| 57          | 2                    | <LOQ | <LOQ | <LOQ    | 4                 | <LOQ | <LOQ | <LOQ    | 2                         | <LOQ  | <LOQ | <LOQ   | 6                 | <LOQ | <LOQ | 0.0017 |
| 58          | 2                    | <LOQ | <LOQ | <LOQ    | 2                 | <LOQ | <LOQ | <LOQ    | 2                         | <LOQ  | <LOQ | <LOQ   | 2                 | <LOQ | <LOQ | <LOQ   |
| 60          | 26                   | <LOQ | <LOQ | 0.0097  | 18                | <LOQ | <LOQ | 0.01    | 28                        | <LOQ  | <LOQ | 0.015  | 16                | <LOQ | <LOQ | 0.011  |
| 61+70+74+76 | 32                   | <LOQ | <LOQ | 0.091   | 10                | <LOQ | <LOQ | 0.06    | 51                        | 0.047 | <LOQ | 0.15   | 16                | <LOQ | <LOQ | 0.11   |
| 63          | 4                    | <LOQ | <LOQ | <LOQ    | 2                 | <LOQ | <LOQ | <LOQ    | 5                         | <LOQ  | <LOQ | <LOQ   | 2                 | <LOQ | <LOQ | <LOQ   |
| 64          | 10                   | <LOQ | <LOQ | 0.0068  | 8                 | <LOQ | <LOQ | 0.0064  | 14                        | <LOQ  | <LOQ | 0.017  | 8                 | <LOQ | <LOQ | 0.0064 |

Table S10, continued

| Congener             | East Chicago (urban) |        |        |        |                   |       |      |        | Columbus Junction (rural) |       |      |        |                   |       |      |        |
|----------------------|----------------------|--------|--------|--------|-------------------|-------|------|--------|---------------------------|-------|------|--------|-------------------|-------|------|--------|
|                      | Mothers (n = 50)     |        |        |        | Children (n = 50) |       |      |        | Mothers (n = 43)          |       |      |        | Children (n = 49) |       |      |        |
|                      | Det                  | Med    | 5%     | 95%    | Det               | Med   | 5%   | 95%    | Det                       | Med   | 5%   | 95%    | Det               | Med   | 5%   | 95%    |
| 66                   | 50                   | 0.0065 | <LOQ   | 0.038  | 38                | <LOQ  | <LOQ | 0.037  | 49                        | <LOQ  | <LOQ | 0.043  | 35                | <LOQ  | <LOQ | 0.045  |
| 67                   | 2                    | <LOQ   | <LOQ   | <LOQ   | 4                 | <LOQ  | <LOQ | <LOQ   | 5                         | <LOQ  | <LOQ | <LOQ   | 4                 | <LOQ  | <LOQ | <LOQ   |
| 68                   | 0                    | <LOQ   | <LOQ   | <LOQ   | 6                 | <LOQ  | <LOQ | 0.002  | 2                         | <LOQ  | <LOQ | <LOQ   | 8                 | <LOQ  | <LOQ | 0.0037 |
| 72                   | 2                    | <LOQ   | <LOQ   | <LOQ   | 4                 | <LOQ  | <LOQ | <LOQ   | 2                         | <LOQ  | <LOQ | <LOQ   | 2                 | <LOQ  | <LOQ | <LOQ   |
| 77                   | 6                    | <LOQ   | <LOQ   | 0.0056 | 10                | <LOQ  | <LOQ | 0.0099 | 16                        | <LOQ  | <LOQ | 0.05   | 16                | <LOQ  | <LOQ | 0.042  |
| 79                   | 0                    | <LOQ   | <LOQ   | <LOQ   | 2                 | <LOQ  | <LOQ | <LOQ   | 5                         | <LOQ  | <LOQ | <LOQ   | 0                 | <LOQ  | <LOQ | <LOQ   |
| 80                   | 6                    | <LOQ   | <LOQ   | 0.0013 | 0                 | <LOQ  | <LOQ | <LOQ   | 5                         | <LOQ  | <LOQ | <LOQ   | 4                 | <LOQ  | <LOQ | <LOQ   |
| 82                   | 10                   | <LOQ   | <LOQ   | 0.0065 | 4                 | <LOQ  | <LOQ | <LOQ   | 5                         | <LOQ  | <LOQ | <LOQ   | 4                 | <LOQ  | <LOQ | <LOQ   |
| 83+99                | 94                   | 0.024  | 0.0049 | 0.056  | 58                | 0.012 | <LOQ | 0.036  | 86                        | 0.025 | <LOQ | 0.05   | 51                | 0.011 | <LOQ | 0.033  |
| 84                   | 2                    | <LOQ   | <LOQ   | <LOQ   | 4                 | <LOQ  | <LOQ | <LOQ   | 7                         | <LOQ  | <LOQ | 0.018  | 6                 | <LOQ  | <LOQ | 0.0042 |
| 85+116+117           | 16                   | <LOQ   | <LOQ   | 0.012  | 6                 | <LOQ  | <LOQ | 0.0054 | 19                        | <LOQ  | <LOQ | 0.013  | 12                | <LOQ  | <LOQ | 0.0072 |
| 86+87+97+109+119+125 | 2                    | <LOQ   | <LOQ   | <LOQ   | 2                 | <LOQ  | <LOQ | <LOQ   | 7                         | <LOQ  | <LOQ | 0.025  | 6                 | <LOQ  | <LOQ | 0.015  |
| 88+91                | 4                    | <LOQ   | <LOQ   | <LOQ   | 0                 | <LOQ  | <LOQ | <LOQ   | 7                         | <LOQ  | <LOQ | 0.0099 | 6                 | <LOQ  | <LOQ | 0.005  |
| 89                   | 4                    | <LOQ   | <LOQ   | <LOQ   | 0                 | <LOQ  | <LOQ | <LOQ   | 0                         | <LOQ  | <LOQ | <LOQ   | 2                 | <LOQ  | <LOQ | <LOQ   |
| 90+101+113           | 4                    | <LOQ   | <LOQ   | <LOQ   | 4                 | <LOQ  | <LOQ | <LOQ   | 7                         | <LOQ  | <LOQ | 0.055  | 6                 | <LOQ  | <LOQ | 0.016  |
| 92                   | 8                    | <LOQ   | <LOQ   | 0.0071 | 6                 | <LOQ  | <LOQ | 0.0028 | 9                         | <LOQ  | <LOQ | 0.01   | 4                 | <LOQ  | <LOQ | <LOQ   |
| 93+100               | 2                    | <LOQ   | <LOQ   | <LOQ   | 0                 | <LOQ  | <LOQ | <LOQ   | 0                         | <LOQ  | <LOQ | <LOQ   | 8                 | <LOQ  | <LOQ | 0.0037 |
| 94                   | 2                    | <LOQ   | <LOQ   | <LOQ   | 2                 | <LOQ  | <LOQ | <LOQ   | 2                         | <LOQ  | <LOQ | <LOQ   | 2                 | <LOQ  | <LOQ | <LOQ   |
| 95                   | 4                    | <LOQ   | <LOQ   | <LOQ   | 4                 | <LOQ  | <LOQ | <LOQ   | 7                         | <LOQ  | <LOQ | 0.065  | 4                 | <LOQ  | <LOQ | <LOQ   |
| 96                   | 2                    | <LOQ   | <LOQ   | <LOQ   | 4                 | <LOQ  | <LOQ | <LOQ   | 2                         | <LOQ  | <LOQ | <LOQ   | 2                 | <LOQ  | <LOQ | <LOQ   |
| 98+102               | 4                    | <LOQ   | <LOQ   | <LOQ   | 2                 | <LOQ  | <LOQ | <LOQ   | 2                         | <LOQ  | <LOQ | <LOQ   | 4                 | <LOQ  | <LOQ | <LOQ   |
| 103                  | 0                    | <LOQ   | <LOQ   | <LOQ   | 0                 | <LOQ  | <LOQ | <LOQ   | 2                         | <LOQ  | <LOQ | <LOQ   | 0                 | <LOQ  | <LOQ | <LOQ   |
| 104                  | 2                    | <LOQ   | <LOQ   | <LOQ   | 4                 | <LOQ  | <LOQ | <LOQ   | 0                         | <LOQ  | <LOQ | <LOQ   | 2                 | <LOQ  | <LOQ | <LOQ   |
| 105                  | 32                   | <LOQ   | <LOQ   | 0.026  | 14                | <LOQ  | <LOQ | 0.025  | 44                        | <LOQ  | <LOQ | 0.028  | 10                | <LOQ  | <LOQ | 0.024  |
| 107+123              | 16                   | <LOQ   | <LOQ   | 0.0063 | 0                 | <LOQ  | <LOQ | <LOQ   | 9                         | <LOQ  | <LOQ | 0.0076 | 0                 | <LOQ  | <LOQ | <LOQ   |
| 108+124              | 2                    | <LOQ   | <LOQ   | <LOQ   | 4                 | <LOQ  | <LOQ | <LOQ   | 0                         | <LOQ  | <LOQ | <LOQ   | 2                 | <LOQ  | <LOQ | <LOQ   |
| 110+115              | 10                   | <LOQ   | <LOQ   | 0.066  | 12                | <LOQ  | <LOQ | 0.068  | 21                        | <LOQ  | <LOQ | 0.074  | 8                 | <LOQ  | <LOQ | 0.028  |

Table S10, continued

| Congener    | East Chicago (urban) |       |        |        |                   |       |      |         | Columbus Junction (rural) |        |       |        |                   |       |      |        |
|-------------|----------------------|-------|--------|--------|-------------------|-------|------|---------|---------------------------|--------|-------|--------|-------------------|-------|------|--------|
|             | Mothers (n = 50)     |       |        |        | Children (n = 50) |       |      |         | Mothers (n = 43)          |        |       |        | Children (n = 49) |       |      |        |
|             | Det                  | Med   | 5%     | 95%    | Det               | Med   | 5%   | 95%     | Det                       | Med    | 5%    | 95%    | Det               | Med   | 5%   | 95%    |
| 111         | 2                    | <LOQ  | <LOQ   | <LOQ   | 2                 | <LOQ  | <LOQ | <LOQ    | 7                         | <LOQ   | <LOQ  | 0.0026 | 0                 | <LOQ  | <LOQ | <LOQ   |
| 112         | 6                    | <LOQ  | <LOQ   | 0.0046 | 6                 | <LOQ  | <LOQ | 0.0035  | 12                        | <LOQ   | <LOQ  | 0.014  | 8                 | <LOQ  | <LOQ | 0.0055 |
| 114         | 24                   | <LOQ  | <LOQ   | 0.0072 | 8                 | <LOQ  | <LOQ | 0.0028  | 12                        | <LOQ   | <LOQ  | 0.0055 | 4                 | <LOQ  | <LOQ | <LOQ   |
| 118         | 84                   | 0.035 | <LOQ   | 0.085  | 42                | <LOQ  | <LOQ | 0.065   | 84                        | 0.041  | <LOQ  | 0.11   | 43                | <LOQ  | <LOQ | 0.058  |
| 120         | 2                    | <LOQ  | <LOQ   | <LOQ   | 2                 | <LOQ  | <LOQ | <LOQ    | 0                         | <LOQ   | <LOQ  | <LOQ   | 0                 | <LOQ  | <LOQ | <LOQ   |
| 121         | 8                    | <LOQ  | <LOQ   | 0.0021 | 2                 | <LOQ  | <LOQ | <LOQ    | 0                         | <LOQ   | <LOQ  | <LOQ   | 0                 | <LOQ  | <LOQ | <LOQ   |
| 122         | 2                    | <LOQ  | <LOQ   | <LOQ   | 2                 | <LOQ  | <LOQ | <LOQ    | 2                         | <LOQ   | <LOQ  | <LOQ   | 6                 | <LOQ  | <LOQ | 0.0019 |
| 126         | 8                    | <LOQ  | <LOQ   | 0.005  | 0                 | <LOQ  | <LOQ | <LOQ    | 5                         | <LOQ   | <LOQ  | <LOQ   | 0                 | <LOQ  | <LOQ | <LOQ   |
| 128+166     | 8                    | <LOQ  | <LOQ   | 0.0047 | 6                 | <LOQ  | <LOQ | 0.0022  | 7                         | <LOQ   | <LOQ  | 0.0036 | 4                 | <LOQ  | <LOQ | <LOQ   |
| 129+138+163 | 94                   | 0.05  | 0.0085 | 0.14   | 68                | 0.015 | <LOQ | 0.062   | 100                       | 0.050  | 0.024 | 0.13   | 61                | 0.014 | <LOQ | 0.045  |
| 130         | 8                    | <LOQ  | <LOQ   | 0.0059 | 4                 | <LOQ  | <LOQ | <LOQ    | 9                         | <LOQ   | <LOQ  | 0.0056 | 2                 | <LOQ  | <LOQ | <LOQ   |
| 131         | 2                    | <LOQ  | <LOQ   | <LOQ   | 0                 | <LOQ  | <LOQ | <LOQ    | 0                         | <LOQ   | <LOQ  | <LOQ   | 2                 | <LOQ  | <LOQ | <LOQ   |
| 132         | 4                    | <LOQ  | <LOQ   | <LOQ   | 6                 | <LOQ  | <LOQ | 0.0043  | 5                         | <LOQ   | <LOQ  | <LOQ   | 0                 | <LOQ  | <LOQ | <LOQ   |
| 133         | 0                    | <LOQ  | <LOQ   | <LOQ   | 2                 | <LOQ  | <LOQ | <LOQ    | 5                         | <LOQ   | <LOQ  | <LOQ   | 2                 | <LOQ  | <LOQ | <LOQ   |
| 134+143     | 4                    | <LOQ  | <LOQ   | <LOQ   | 2                 | <LOQ  | <LOQ | <LOQ    | 2                         | <LOQ   | <LOQ  | <LOQ   | 0                 | <LOQ  | <LOQ | <LOQ   |
| 135+151     | 4                    | <LOQ  | <LOQ   | <LOQ   | 0                 | <LOQ  | <LOQ | <LOQ    | 9                         | <LOQ   | <LOQ  | 0.012  | 4                 | <LOQ  | <LOQ | <LOQ   |
| 136         | 2                    | <LOQ  | <LOQ   | <LOQ   | 0                 | <LOQ  | <LOQ | <LOQ    | 7                         | <LOQ   | <LOQ  | 0.0074 | 4                 | <LOQ  | <LOQ | <LOQ   |
| 137+164     | 20                   | <LOQ  | <LOQ   | 0.009  | 4                 | <LOQ  | <LOQ | <LOQ    | 19                        | <LOQ   | <LOQ  | 0.011  | 8                 | <LOQ  | <LOQ | 0.0052 |
| 139+140     | 8                    | <LOQ  | <LOQ   | 0.0029 | 4                 | <LOQ  | <LOQ | <LOQ    | 2                         | <LOQ   | <LOQ  | <LOQ   | 4                 | <LOQ  | <LOQ | <LOQ   |
| 141         | 2                    | <LOQ  | <LOQ   | <LOQ   | 2                 | <LOQ  | <LOQ | <LOQ    | 2                         | <LOQ   | <LOQ  | <LOQ   | 0                 | <LOQ  | <LOQ | <LOQ   |
| 142         | 0                    | <LOQ  | <LOQ   | <LOQ   | 0                 | <LOQ  | <LOQ | <LOQ    | 0                         | <LOQ   | <LOQ  | <LOQ   | 2                 | <LOQ  | <LOQ | <LOQ   |
| 144         | 4                    | <LOQ  | <LOQ   | <LOQ   | 2                 | <LOQ  | <LOQ | <LOQ    | 0                         | <LOQ   | <LOQ  | <LOQ   | 2                 | <LOQ  | <LOQ | <LOQ   |
| 145         | 2                    | <LOQ  | <LOQ   | <LOQ   | 6                 | <LOQ  | <LOQ | 0.00091 | 2                         | <LOQ   | <LOQ  | <LOQ   | 2                 | <LOQ  | <LOQ | <LOQ   |
| 146         | 76                   | 0.008 | <LOQ   | 0.022  | 22                | <LOQ  | <LOQ | 0.0097  | 74                        | 0.0078 | <LOQ  | 0.022  | 24                | <LOQ  | <LOQ | 0.012  |
| 147+149     | 4                    | <LOQ  | <LOQ   | <LOQ   | 0                 | <LOQ  | <LOQ | <LOQ    | 9                         | <LOQ   | <LOQ  | 0.013  | 6                 | <LOQ  | <LOQ | 0.0055 |
| 148         | 2                    | <LOQ  | <LOQ   | <LOQ   | 0                 | <LOQ  | <LOQ | <LOQ    | 2                         | <LOQ   | <LOQ  | <LOQ   | 2                 | <LOQ  | <LOQ | <LOQ   |
| 150         | 2                    | <LOQ  | <LOQ   | <LOQ   | 0                 | <LOQ  | <LOQ | <LOQ    | 0                         | <LOQ   | <LOQ  | <LOQ   | 0                 | <LOQ  | <LOQ | <LOQ   |

Table S10, continued

| Congener | East Chicago (urban) |        |       |        |                   |        |      |        | Columbus Junction (rural) |       |       |        |                   |        |      |        |
|----------|----------------------|--------|-------|--------|-------------------|--------|------|--------|---------------------------|-------|-------|--------|-------------------|--------|------|--------|
|          | Mothers (n = 50)     |        |       |        | Children (n = 50) |        |      |        | Mothers (n = 43)          |       |       |        | Children (n = 49) |        |      |        |
|          | Det                  | Med    | 5%    | 95%    | Det               | Med    | 5%   | 95%    | Det                       | Med   | 5%    | 95%    | Det               | Med    | 5%   | 95%    |
| 152      | 2                    | <LOQ   | <LOQ  | <LOQ   | 0                 | <LOQ   | <LOQ | <LOQ   | 0                         | <LOQ  | <LOQ  | <LOQ   | 0                 | <LOQ   | <LOQ | <LOQ   |
| 153+168  | 98                   | 0.055  | 0.022 | 0.17   | 78                | 0.014  | <LOQ | 0.055  | 100                       | 0.065 | 0.023 | 0.18   | 80                | 0.014  | <LOQ | 0.057  |
| 155      | 0                    | <LOQ   | <LOQ  | <LOQ   | 2                 | <LOQ   | <LOQ | <LOQ   | 2                         | <LOQ  | <LOQ  | <LOQ   | 0                 | <LOQ   | <LOQ | <LOQ   |
| 156+157  | 52                   | 0.0091 | <LOQ  | 0.034  | 8                 | <LOQ   | <LOQ | 0.014  | 65                        | 0.011 | <LOQ  | 0.034  | 10                | <LOQ   | <LOQ | 0.014  |
| 158      | 12                   | <LOQ   | <LOQ  | 0.0036 | 0                 | <LOQ   | <LOQ | <LOQ   | 7                         | <LOQ  | <LOQ  | 0.0028 | 10                | <LOQ   | <LOQ | 0.0037 |
| 159      | 0                    | <LOQ   | <LOQ  | <LOQ   | 2                 | <LOQ   | <LOQ | <LOQ   | 0                         | <LOQ  | <LOQ  | <LOQ   | 0                 | <LOQ   | <LOQ | <LOQ   |
| 160      | 8                    | <LOQ   | <LOQ  | 0.0099 | 6                 | <LOQ   | <LOQ | 0.001  | 9                         | <LOQ  | <LOQ  | 0.028  | 4                 | <LOQ   | <LOQ | <LOQ   |
| 161      | 6                    | <LOQ   | <LOQ  | 0.0017 | 2                 | <LOQ   | <LOQ | <LOQ   | 9                         | <LOQ  | <LOQ  | 0.0048 | 2                 | <LOQ   | <LOQ | <LOQ   |
| 162      | 2                    | <LOQ   | <LOQ  | <LOQ   | 0                 | <LOQ   | <LOQ | <LOQ   | 0                         | <LOQ  | <LOQ  | <LOQ   | 6                 | <LOQ   | <LOQ | 0.0023 |
| 165      | 4                    | <LOQ   | <LOQ  | <LOQ   | 0                 | <LOQ   | <LOQ | <LOQ   | 0                         | <LOQ  | <LOQ  | <LOQ   | 2                 | <LOQ   | <LOQ | <LOQ   |
| 167      | 26                   | <LOQ   | <LOQ  | 0.0074 | 10                | <LOQ   | <LOQ | 0.003  | 30                        | <LOQ  | <LOQ  | 0.01   | 8                 | <LOQ   | <LOQ | 0.0038 |
| 169      | 0                    | <LOQ   | <LOQ  | <LOQ   | 2                 | <LOQ   | <LOQ | <LOQ   | 2                         | <LOQ  | <LOQ  | <LOQ   | 0                 | <LOQ   | <LOQ | <LOQ   |
| 170      | 72                   | 0.012  | <LOQ  | 0.043  | 20                | <LOQ   | <LOQ | 0.014  | 84                        | 0.015 | <LOQ  | 0.063  | 16                | <LOQ   | <LOQ | 0.013  |
| 171+173  | 20                   | <LOQ   | <LOQ  | 0.0061 | 6                 | <LOQ   | <LOQ | 0.0033 | 16                        | <LOQ  | <LOQ  | 0.0097 | 14                | <LOQ   | <LOQ | 0.0047 |
| 172      | 4                    | <LOQ   | <LOQ  | <LOQ   | 0                 | <LOQ   | <LOQ | <LOQ   | 12                        | <LOQ  | <LOQ  | 0.011  | 6                 | <LOQ   | <LOQ | 0.0031 |
| 174      | 4                    | <LOQ   | <LOQ  | <LOQ   | 0                 | <LOQ   | <LOQ | <LOQ   | 0                         | <LOQ  | <LOQ  | <LOQ   | 2                 | <LOQ   | <LOQ | <LOQ   |
| 175      | 6                    | <LOQ   | <LOQ  | 0.0022 | 6                 | <LOQ   | <LOQ | 0.0025 | 0                         | <LOQ  | <LOQ  | <LOQ   | 0                 | <LOQ   | <LOQ | <LOQ   |
| 176      | 2                    | <LOQ   | <LOQ  | <LOQ   | 4                 | <LOQ   | <LOQ | <LOQ   | 0                         | <LOQ  | <LOQ  | <LOQ   | 2                 | <LOQ   | <LOQ | <LOQ   |
| 177      | 16                   | <LOQ   | <LOQ  | 0.008  | 10                | <LOQ   | <LOQ | 0.0059 | 28                        | <LOQ  | <LOQ  | 0.011  | 10                | <LOQ   | <LOQ | 0.0056 |
| 178      | 20                   | <LOQ   | <LOQ  | 0.01   | 0                 | <LOQ   | <LOQ | <LOQ   | 23                        | <LOQ  | <LOQ  | 0.015  | 6                 | <LOQ   | <LOQ | 0.0012 |
| 179      | 12                   | <LOQ   | <LOQ  | 0.0045 | 4                 | <LOQ   | <LOQ | <LOQ   | 0                         | <LOQ  | <LOQ  | <LOQ   | 0                 | <LOQ   | <LOQ | <LOQ   |
| 180+193  | 98                   | 0.031  | 0.013 | 0.14   | 54                | 0.0052 | <LOQ | 0.028  | 100                       | 0.036 | 0.016 | 0.22   | 61                | 0.0065 | <LOQ | 0.036  |
| 181      | 4                    | <LOQ   | <LOQ  | <LOQ   | 0                 | <LOQ   | <LOQ | <LOQ   | 2                         | <LOQ  | <LOQ  | <LOQ   | 0                 | <LOQ   | <LOQ | <LOQ   |
| 182      | 8                    | <LOQ   | <LOQ  | 0.0038 | 8                 | <LOQ   | <LOQ | 0.0041 | 9                         | <LOQ  | <LOQ  | 0.014  | 4                 | <LOQ   | <LOQ | <LOQ   |
| 183+185  | 36                   | <LOQ   | <LOQ  | 0.017  | 6                 | <LOQ   | <LOQ | 0.0046 | 44                        | <LOQ  | <LOQ  | 0.015  | 2                 | <LOQ   | <LOQ | <LOQ   |
| 184      | 2                    | <LOQ   | <LOQ  | <LOQ   | 8                 | <LOQ   | <LOQ | 0.004  | 2                         | <LOQ  | <LOQ  | <LOQ   | 0                 | <LOQ   | <LOQ | <LOQ   |
| 186      | 2                    | <LOQ   | <LOQ  | <LOQ   | 6                 | <LOQ   | <LOQ | 0.0023 | 0                         | <LOQ  | <LOQ  | <LOQ   | 4                 | <LOQ   | <LOQ | <LOQ   |

Table S10, continued

| Congener | East Chicago (urban) |       |       |        |                   |      |       |        | Columbus Junction (rural) |        |      |        |                   |      |        |        |
|----------|----------------------|-------|-------|--------|-------------------|------|-------|--------|---------------------------|--------|------|--------|-------------------|------|--------|--------|
|          | Mothers (n = 50)     |       |       |        | Children (n = 50) |      |       |        | Mothers (n = 43)          |        |      |        | Children (n = 49) |      |        |        |
|          | Det                  | Med   | 5%    | 95%    | Det               | Med  | 5%    | 95%    | Det                       | Med    | 5%   | 95%    | Det               | Med  | 5%     | 95%    |
| 187      | 84                   | 0.011 | <LOQ  | 0.041  | 20                | <LOQ | <LOQ  | 0.011  | 86                        | 0.018  | <LOQ | 0.08   | 27                | <LOQ | <LOQ   | 0.018  |
| 188      | 0                    | <LOQ  | <LOQ  | <LOQ   | 4                 | <LOQ | <LOQ  | <LOQ   | 2                         | <LOQ   | <LOQ | <LOQ   | 0                 | <LOQ | <LOQ   | <LOQ   |
| 189      | 0                    | <LOQ  | <LOQ  | <LOQ   | 0                 | <LOQ | <LOQ  | <LOQ   | 2                         | <LOQ   | <LOQ | <LOQ   | 0                 | <LOQ | <LOQ   | <LOQ   |
| 190      | 22                   | <LOQ  | <LOQ  | 0.007  | 10                | <LOQ | <LOQ  | 0.0036 | 28                        | <LOQ   | <LOQ | 0.0099 | 8                 | <LOQ | <LOQ   | 0.0036 |
| 191      | 4                    | <LOQ  | <LOQ  | <LOQ   | 0                 | <LOQ | <LOQ  | <LOQ   | 5                         | <LOQ   | <LOQ | <LOQ   | 2                 | <LOQ | <LOQ   | <LOQ   |
| 192      | 0                    | <LOQ  | <LOQ  | <LOQ   | 2                 | <LOQ | <LOQ  | <LOQ   | 0                         | <LOQ   | <LOQ | <LOQ   | 2                 | <LOQ | <LOQ   | <LOQ   |
| 194      | 20                   | <LOQ  | <LOQ  | 0.016  | 2                 | <LOQ | <LOQ  | <LOQ   | 42                        | <LOQ   | <LOQ | 0.023  | 4                 | <LOQ | <LOQ   | <LOQ   |
| 195      | 10                   | <LOQ  | <LOQ  | 0.0077 | 0                 | <LOQ | <LOQ  | <LOQ   | 7                         | <LOQ   | <LOQ | 0.005  | 4                 | <LOQ | <LOQ   | <LOQ   |
| 196      | 12                   | <LOQ  | <LOQ  | 0.01   | 0                 | <LOQ | <LOQ  | <LOQ   | 19                        | <LOQ   | <LOQ | 0.015  | 2                 | <LOQ | <LOQ   | <LOQ   |
| 197+200  | 12                   | <LOQ  | <LOQ  | 0.0057 | 4                 | <LOQ | <LOQ  | <LOQ   | 2                         | <LOQ   | <LOQ | <LOQ   | 6                 | <LOQ | <LOQ   | 0.0026 |
| 198+199  | 44                   | <LOQ  | <LOQ  | 0.032  | 4                 | <LOQ | <LOQ  | <LOQ   | 63                        | 0.0099 | <LOQ | 0.04   | 8                 | <LOQ | <LOQ   | 0.01   |
| 201      | 2                    | <LOQ  | <LOQ  | <LOQ   | 2                 | <LOQ | <LOQ  | <LOQ   | 5                         | <LOQ   | <LOQ | <LOQ   | 0                 | <LOQ | <LOQ   | <LOQ   |
| 202      | 24                   | <LOQ  | <LOQ  | 0.0077 | 6                 | <LOQ | <LOQ  | 0.0019 | 30                        | <LOQ   | <LOQ | 0.009  | 4                 | <LOQ | <LOQ   | <LOQ   |
| 203      | 36                   | <LOQ  | <LOQ  | 0.018  | 4                 | <LOQ | <LOQ  | <LOQ   | 58                        | 0.0056 | <LOQ | 0.02   | 8                 | <LOQ | <LOQ   | 0.0055 |
| 204      | 4                    | <LOQ  | <LOQ  | <LOQ   | 0                 | <LOQ | <LOQ  | <LOQ   | 5                         | <LOQ   | <LOQ | <LOQ   | 0                 | <LOQ | <LOQ   | <LOQ   |
| 205      | 8                    | <LOQ  | <LOQ  | 0.0083 | 0                 | <LOQ | <LOQ  | <LOQ   | 0                         | <LOQ   | <LOQ | <LOQ   | 0                 | <LOQ | <LOQ   | <LOQ   |
| 206      | 18                   | <LOQ  | <LOQ  | 0.011  | 2                 | <LOQ | <LOQ  | <LOQ   | 26                        | <LOQ   | <LOQ | 0.016  | 0                 | <LOQ | <LOQ   | <LOQ   |
| 207      | 2                    | <LOQ  | <LOQ  | <LOQ   | 0                 | <LOQ | <LOQ  | <LOQ   | 0                         | <LOQ   | <LOQ | <LOQ   | 0                 | <LOQ | <LOQ   | <LOQ   |
| 208      | 6                    | <LOQ  | <LOQ  | 0.0027 | 2                 | <LOQ | <LOQ  | <LOQ   | 9                         | <LOQ   | <LOQ | 0.0061 | 0                 | <LOQ | <LOQ   | <LOQ   |
| 209      | 34                   | <LOQ  | <LOQ  | 0.0036 | 0                 | <LOQ | <LOQ  | <LOQ   | 42                        | <LOQ   | <LOQ | 0.0093 | 4                 | <LOQ | <LOQ   | <LOQ   |
| ΣPCBs    | 100                  | 0.41  | 0.094 | 1.1    | 100               | 0.11 | 0.017 | 0.5    | 100                       | 0.45   | 0.16 | 1.6    | 98                | 0.11 | 0.0071 | 0.58   |

Note: Detections are reported as percent of the subgroup. PCBs not listed were not detected in any samples.

Table S11 Frequency of detection (Det), median (Med) and range (5th-95th percentile) of OH-PCBs (ng/g fresh weight) detected in mothers and children from East Chicago and Columbus Junction.

| Congener     | East Chicago (urban) |        |        |         |                   |        |        |        | Columbus Junction (rural) |        |        |        |                   |        |        |        |
|--------------|----------------------|--------|--------|---------|-------------------|--------|--------|--------|---------------------------|--------|--------|--------|-------------------|--------|--------|--------|
|              | Mothers (n = 39)     |        |        |         | Children (n = 41) |        |        |        | Mothers (n = 37)          |        |        |        | Children (n = 43) |        |        |        |
|              | Det                  | Med    | 5%     | 95%     | Det               | Med    | 5%     | 95%    | Det                       | Med    | 5%     | 95%    | Det               | Med    | 5%     | 95%    |
| 4'-OH-PCB107 | 100                  | 0.032  | 0.021  | 0.080   | 95                | 0.032  | 0.017  | 0.071  | 97                        | 0.031  | 0.022  | 0.083  | 98                | 0.026  | 0.018  | 0.046  |
| 3'-OH-PCB118 | 62                   | 0.0050 | <LOQ   | 0.051   | 66                | 0.0050 | <LOQ   | 0.037  | 62                        | 0.0037 | <LOQ   | 0.029  | 58                | 0.0028 | <LOQ   | 0.012  |
| 4'-OH-PCB120 | 38                   | <LOQ   | <LOQ   | 0.073   | 27                | <LOQ   | <LOQ   | 0.056  | 32                        | <LOQ   | <LOQ   | 0.087  | 16                | <LOQ   | <LOQ   | 0.020  |
| 4'-OH-PCB130 | 5                    | <LOQ   | <LOQ   | 0.00092 | 0                 | <LOQ   | <LOQ   | <LOQ   | 0                         | <LOQ   | <LOQ   | <LOQ   | 2                 | <LOQ   | <LOQ   | <LOQ   |
| 3'-OH-PCB138 | 72                   | 0.0031 | <LOQ   | 0.075   | 59                | 0.0023 | <LOQ   | 0.043  | 81                        | 0.0062 | <LOQ   | 0.12   | 51                | 0.0016 | <LOQ   | 0.020  |
| 4'-OH-PCB146 | 69                   | 0.0081 | <LOQ   | 0.048   | 51                | 0.0047 | <LOQ   | 0.018  | 73                        | 0.0097 | <LOQ   | 0.040  | 42                | <LOQ   | <LOQ   | 0.018  |
| 4'-OH-PCB163 | 51                   | 0.0016 | <LOQ   | 0.013   | 37                | <LOQ   | <LOQ   | 0.0061 | 62                        | 0.0018 | <LOQ   | 0.014  | 40                | <LOQ   | <LOQ   | 0.0030 |
| 4'-OH-PCB172 | 38                   | <LOQ   | <LOQ   | 0.033   | 27                | <LOQ   | <LOQ   | 0.030  | 38                        | <LOQ   | <LOQ   | 0.033  | 37                | <LOQ   | <LOQ   | 0.028  |
| 3'-OH-PCB180 | 2.6                  | <LOQ   | <LOQ   | <LOQ    | 2                 | <LOQ   | <LOQ   | <LOQ   | 5                         | <LOQ   | <LOQ   | 0.0010 | 0                 | <LOQ   | <LOQ   | <LOQ   |
| 4'-OH-PCB187 | 100                  | 0.018  | 0.0096 | 0.051   | 100               | 0.013  | 0.0080 | 0.021  | 100                       | 0.020  | 0.010  | 0.054  | 100               | 0.012  | 0.0064 | 0.022  |
| 4'-OH-PCB193 | 10                   | <LOQ   | <LOQ   | 0.028   | 15                | <LOQ   | <LOQ   | 0.012  | 24                        | <LOQ   | <LOQ   | 0.031  | 33                | <LOQ   | <LOQ   | 0.030  |
| ΣOH-PCBs     | 100                  | 0.11   | 0.046  | 0.30    | 100               | 0.079  | 0.037  | 0.21   | 100                       | 0.12   | 0.0421 | 0.31   | 100               | 0.066  | 0.029  | 0.15   |

Note: Detections are reported as percent of the subgroup.



Table S12 Summary of correlations tested between year 1 and year 2 concentrations.

| Congener            | Group Tested               | n   | R <sup>2</sup> | p       |
|---------------------|----------------------------|-----|----------------|---------|
| <b>PCBs</b>         |                            |     |                |         |
| ΣPCBs               | East Chicago mothers       | 36  | 0.47           | <0.0001 |
|                     | East Chicago children      | 33  | 0.03           | 0.33    |
|                     | Columbus Junction mothers  | 38  | 0.09           | 0.06    |
|                     | Columbus Junction children | 39  | 0.05           | 0.17    |
|                     | all participants           | 146 | 0.26           | <0.0001 |
| 20+28               | all participants           | 20  | 0.77           | <0.0001 |
| 83+99               | all participants           | 50  | 0.15           | 0.0065  |
| 118                 | all participants           | 62  | 0.03           | 0.15    |
| 129+137+138+163+164 | all participants           | 90  | 0.51           | <0.0001 |
| 153+168             | all participants           | 105 | 0.70           | <0.0001 |
| 180+193             | all participants           | 38  | 0.75           | <0.0001 |
| 187                 | all participants           | 29  | 0.55           | <0.0001 |
| <b>OH-PCBs</b>      |                            |     |                |         |
| ΣOH-PCBs            | East Chicago mothers       | 28  | 0.36           | 0.0008  |
|                     | East Chicago children      | 32  | 0.09           | 0.09    |
|                     | Columbus Junction mothers  | 34  | 0.04           | 0.27    |
|                     | Columbus Junction children | 36  | 0.21           | 0.006   |
|                     | all participants           | 130 | 0.20           | <0.0001 |
| 4-OH-PCB 107        | all participants           | 73  | 0.16           | 0.0006  |
| 4-OH-PCB 146        | all participants           | 56  | 0.24           | 0.0002  |
| 4-OH-PCB 187        | all participants           | 129 | 0.53           | <0.0001 |

Note: Congeners were chosen as those detected in at least 20% of year 1 participants. Value for n represents the number of participants with concentrations measured above the LOQ in both years. Participants with one or both concentrations below the LOQ were excluded from the correlation analysis.

#### References

1. Marek, R. F.; Thorne, P. S.; Wang, K.; DeWall, J.; Hornbuckle, K. C., PCBs and OH-PCBs in serum from children and mothers in urban and rural U.S. communities. *Environ. Sci. Technol.* **2013**, *47*, (7), 3353-61.
